# Supplementary material for: Polygenic Susceptibility to Hypertension is Associated with Worse Cognitive Performance in Middle-Aged Persons without Dementia
Source: bioRxiv or medRxiv preprint supplement (doi:10.1101/2022.09.27.22280434), 2022-09-29
Supplement: Supplementary file [file media-1.pdf]

**Polygenic Susceptibility to Hypertension is Associated with  
Worse Cognitive Function in Middle-Aged Persons without Dementia**

Cyprien Rivier MD MSc, Natalia Szejko MD PhD ScD, Rommell Noche BSc,

Julian N. Acosta MD, Cameron P. Both BS, Richa Sharma MD,

Syedmehdi Payabvash MD, Adam De Havenon MD, Kevin N. Sheth MD,

Thomas M. Gill MD, Guido J. Falcone MD ScD MPH

**Supplemental Table 1. Single nucleotide polymorphisms included in the polygenic risk score.**

| CHR | BP        | SNP         | A1 | A2 | Beta_SBP | se_SBP | Beta_DBP | se_DBP |
|-----|-----------|-------------|----|----|----------|--------|----------|--------|
| 1   | 1687482   | rs2076328   | T  | G  | -0.2824  | 0.0498 | -0.0965  | 0.0292 |
| 1   | 2187085   | rs260508    | T  | G  | 0.1297   | 0.0441 | 0.0854   | 0.0323 |
| 1   | 3328659   | rs2493292   | T  | C  | 0.2686   | 0.068  | 0.1674   | 0.0401 |
| 1   | 6278414   | rs709209    | A  | G  | 0.0935   | 0.0528 | -0.0271  | 0.0308 |
| 1   | 7739250   | rs4908678   | T  | C  | -0.1203  | 0.0484 | -0.1065  | 0.0285 |
| 1   | 8422676   | rs2252865   | T  | C  | 0.159    | 0.0434 | 0.0976   | 0.0318 |
| 1   | 9441949   | rs9662255   | A  | C  | -0.1883  | 0.0482 | -0.0156  | 0.0283 |
| 1   | 10796866  | rs880315    | T  | C  | -0.5218  | 0.0499 | -0.2524  | 0.0293 |
| 1   | 11862778  | rs17367504  | A  | G  | 0.7774   | 0.0639 | 0.4715   | 0.0377 |
| 1   | 15798197  | rs3820068   | A  | G  | 0.3361   | 0.0596 | 0.1279   | 0.0349 |
| 1   | 22577371  | rs2807337   | T  | C  | 0.1551   | 0.0423 | 0.0587   | 0.031  |
| 1   | 23442265  | rs150266910 | T  | C  | 0.0726   | 0.0549 | -0.0572  | 0.0403 |
| 1   | 25030470  | rs6686889   | T  | C  | 0.0854   | 0.0531 | 0.115    | 0.0312 |
| 1   | 27284913  | rs79598313  | T  | C  | 0.456    | 0.1367 | 0.1923   | 0.0994 |
| 1   | 28734372  | rs143167197 | A  | G  | -0.3388  | 0.0834 | -0.0493  | 0.0608 |
| 1   | 29549216  | rs1565716   | A  | G  | 0.3142   | 0.0837 | 0.16     | 0.0614 |
| 1   | 38298207  | rs9729719   | A  | G  | 0.1015   | 0.053  | -0.0344  | 0.0311 |
| 1   | 41865293  | rs11210029  | A  | G  | -0.1608  | 0.0476 | -0.0934  | 0.0281 |
| 1   | 42408070  | rs7515635   | T  | C  | 0.2382   | 0.0463 | 0.109    | 0.0273 |
| 1   | 43037556  | rs72659998  | T  | C  | -0.1037  | 0.0569 | 0.0535   | 0.0417 |
| 1   | 43856410  | rs839755    | A  | C  | -0.1499  | 0.0434 | -0.0791  | 0.0318 |
| 1   | 46027355  | rs512083    | T  | C  | -0.0998  | 0.0419 | 0.0453   | 0.0307 |
| 1   | 46541679  | rs12142296  | T  | G  | -0.2038  | 0.0633 | -0.1959  | 0.0463 |
| 1   | 48109225  | rs4926923   | T  | C  | 0.1997   | 0.0834 | 0.1459   | 0.0492 |
| 1   | 49052423  | rs11579440  | T  | C  | 0.2794   | 0.0653 | 0.1546   | 0.0383 |
| 1   | 51021867  | rs147696085 | A  | G  | -0.0739  | 0.0797 | 0.1416   | 0.047  |
| 1   | 51527684  | rs6681713   | T  | G  | 0.2032   | 0.163  | 0.3834   | 0.1194 |
| 1   | 56576924  | rs112557609 | A  | G  | 0.2383   | 0.0489 | 0.083    | 0.0287 |
| 1   | 57008778  | rs2404715   | T  | C  | -0.1997  | 0.0797 | 0.0016   | 0.0469 |
| 1   | 59663341  | rs60199046  | A  | G  | 0.1782   | 0.0507 | -0.0758  | 0.0297 |
| 1   | 67071356  | rs20354     | T  | G  | 0.1836   | 0.0612 | 0.0285   | 0.0449 |
| 1   | 78450517  | rs34517439  | A  | C  | 0.0172   | 0.0736 | -0.165   | 0.0537 |
| 1   | 86040107  | rs12034319  | A  | G  | 0.1072   | 0.0514 | 0.0085   | 0.0376 |
| 1   | 86822231  | rs385437    | A  | G  | 0.168    | 0.0581 | 0.0314   | 0.0424 |
| 1   | 88651771  | rs10923038  | A  | C  | 0.1279   | 0.0481 | 0.062    | 0.0283 |
| 1   | 89360158  | rs10922502  | A  | G  | -0.2283  | 0.0483 | -0.105   | 0.0284 |
| 1   | 90228519  | rs2065152   | T  | C  | 0.1855   | 0.0478 | 0.1374   | 0.0281 |
| 1   | 94051350  | rs7514579   | A  | C  | 0.1443   | 0.05   | 0.04     | 0.0367 |
| 1   | 94730954  | rs17396055  | A  | G  | -0.1654  | 0.0462 | -0.07    | 0.0338 |
| 1   | 113190807 | rs17030613  | A  | C  | -0.3923  | 0.056  | -0.2359  | 0.033  |
| 1   | 113216543 | rs2932538   | A  | G  | -0.3435  | 0.0527 | -0.237   | 0.0311 |
| 1   | 154245917 | rs13796     | T  | C  | -0.0984  | 0.0705 | -0.1446  | 0.0413 |
| 1   | 156129796 | rs76719272  | T  | C  | -0.1708  | 0.0651 | -0.0415  | 0.0476 |
| 1   | 164740099 | rs2171690   | T  | C  | 0.151    | 0.0461 | 0.1371   | 0.0272 |
| 1   | 167367193 | rs7524019   | T  | C  | 0.1516   | 0.0466 | 0.0729   | 0.0275 |
| 1   | 169201567 | rs2157597   | T  | C  | -0.0856  | 0.049  | 0.0034   | 0.0288 |
| 1   | 172357441 | rs12405515  | T  | G  | -0.1713  | 0.0461 | -0.1617  | 0.0272 |
| 1   | 176634724 | rs12118102  | A  | G  | 0.2941   | 0.0939 | 0.0111   | 0.0687 |
| 1   | 179571862 | rs150816167 | T  | C  | -0.0442  | 0.1247 | -0.2378  | 0.0727 |
| 1   | 180131640 | rs10913934  | T  | G  | 0.1302   | 0.0439 | -0.0255  | 0.0322 |
| 1   | 180859368 | rs1043069   | T  | G  | 0.1287   | 0.0446 | 0.0445   | 0.0327 |
| 1   | 183058452 | rs41475048  | A  | G  | -0.1144  | 0.0549 | -0.0869  | 0.0323 |
| 1   | 184585182 | rs4651224   | T  | C  | 0.186    | 0.0433 | 0.1277   | 0.0317 |
| 1   | 197297417 | rs12042924  | T  | C  | -0.1235  | 0.0427 | -0.0202  | 0.0313 |
| 1   | 201735913 | rs882624    | T  | C  | 0.0116   | 0.0458 | -0.1423  | 0.0335 |
| 1   | 203109801 | rs33996239  | T  | C  | -0.3263  | 0.1012 | -0.1663  | 0.074  |
| 1   | 204518842 | rs4245739   | A  | C  | 0.1702   | 0.0525 | 0.1364   | 0.0309 |
| 1   | 207220800 | rs2629665   | A  | C  | -0.205   | 0.0476 | -0.1199  | 0.028  |
| 1   | 207919748 | rs2761436   | T  | C  | 0.1927   | 0.0461 | 0.0311   | 0.0271 |
| 1   | 217718789 | rs12408022  | T  | C  | 0.2511   | 0.0532 | 0.1486   | 0.0313 |
| 1   | 219753509 | rs2820443   | T  | C  | 0.2272   | 0.0457 | 0.0317   | 0.0335 |
| 1   | 221358796 | rs9431431   | A  | G  | -0.1703  | 0.0506 | -0.1088  | 0.0298 |
| 1   | 227250775 | rs73091767  | T  | C  | -0.0906  | 0.0516 | -0.0874  | 0.0304 |
| 1   | 230848702 | rs2004776   | T  | C  | 0.3368   | 0.0542 | 0.2356   | 0.0319 |
| 1   | 243472801 | rs6429422   | T  | G  | -0.1434  | 0.0492 | -0.1919  | 0.029  |

|   |           |             |   |   |         |        |          |        |
|---|-----------|-------------|---|---|---------|--------|----------|--------|
| 2 | 9298590   | rs2175337   | A | C | 0.1118  | 0.0432 | -0.0678  | 0.0316 |
| 2 | 18975439  | rs67720684  | A | C | 0.2242  | 0.0512 | 0.0676   | 0.0375 |
| 2 | 19730845  | rs1344653   | A | G | -0.1568 | 0.0456 | 0.068    | 0.0268 |
| 2 | 20878820  | rs7255      | T | C | -0.0707 | 0.0469 | 0.0752   | 0.0276 |
| 2 | 21423532  | rs66774912  | A | G | -0.1582 | 0.0674 | 0.0366   | 0.0398 |
| 2 | 23950200  | rs10779936  | A | G | -0.1093 | 0.0505 | 0.0174   | 0.0298 |
| 2 | 25139596  | rs55701159  | T | G | 0.2999  | 0.0742 | 0.1466   | 0.0435 |
| 2 | 26914364  | rs1275988   | T | C | -0.5157 | 0.0466 | -0.2792  | 0.0274 |
| 2 | 27887034  | rs9678851   | A | C | -0.1135 | 0.0474 | -0.0585  | 0.0278 |
| 2 | 28635740  | rs7562      | T | C | 0.1555  | 0.047  | 0.0832   | 0.0276 |
| 2 | 34679626  | rs1607644   | A | G | -0.1269 | 0.0427 | -0.1343  | 0.0313 |
| 2 | 37517566  | rs13420463  | A | G | 0.2751  | 0.0555 | 0.1273   | 0.0326 |
| 2 | 40567743  | rs4952611   | T | C | -0.2135 | 0.0487 | -0.1342  | 0.0286 |
| 2 | 42352567  | rs11681462  | A | C | -0.1806 | 0.0583 | -0.1257  | 0.0343 |
| 2 | 43167878  | rs76326501  | A | C | 0.5511  | 0.0829 | 0.36     | 0.0487 |
| 2 | 43716933  | rs35590893  | A | G | -0.1706 | 0.0477 | -0.0595  | 0.0349 |
| 2 | 46363336  | rs11690961  | A | C | 0.0228  | 0.0722 | -0.1655  | 0.0424 |
| 2 | 50429861  | rs6545155   | T | C | 0.1442  | 0.0503 | 0.07     | 0.037  |
| 2 | 53025757  | rs10189186  | A | G | 0.1752  | 0.0459 | 0.0753   | 0.027  |
| 2 | 55279681  | rs2920899   | T | G | 0.1579  | 0.0529 | 0.0677   | 0.0386 |
| 2 | 55809054  | rs1975487   | A | G | -0.2206 | 0.0472 | -0.1737  | 0.0277 |
| 2 | 59315828  | rs6730325   | A | G | -0.1258 | 0.0428 | 3.00E-04 | 0.0314 |
| 2 | 61836235  | rs7608483   | A | C | 0.1652  | 0.047  | 0.1016   | 0.0277 |
| 2 | 64217786  | rs13014371  | T | C | -0.1602 | 0.0464 | -0.1086  | 0.0273 |
| 2 | 66104881  | rs2631669   | T | C | -0.0029 | 0.0416 | -0.0904  | 0.0305 |
| 2 | 66782467  | rs2300481   | T | C | 0.1887  | 0.0427 | 0.075    | 0.0313 |
| 2 | 68503044  | rs6731373   | A | G | 0.1785  | 0.0461 | 0.007    | 0.0338 |
| 2 | 69065841  | rs12052761  | A | G | -0.1301 | 0.0475 | -0.1232  | 0.0279 |
| 2 | 71627539  | rs3771371   | T | C | -0.1814 | 0.0464 | -0.0684  | 0.0273 |
| 2 | 72483329  | rs10193543  | T | G | 0.2859  | 0.0629 | 0.1996   | 0.0376 |
| 2 | 73114352  | rs1876487   | A | C | -0.0825 | 0.0545 | -0.1105  | 0.0319 |
| 2 | 85491365  | rs11689667  | T | C | 0.1189  | 0.0465 | -0.0348  | 0.0274 |
| 2 | 86326717  | rs72847885  | A | G | 0.1717  | 0.0452 | 0.0746   | 0.0331 |
| 2 | 96675166  | rs2579519   | T | C | -0.0054 | 0.0484 | -0.1499  | 0.0284 |
| 2 | 98357163  | rs4851462   | T | C | -0.0051 | 0.0437 | -0.0948  | 0.032  |
| 2 | 112769721 | rs28377357  | A | G | -0.1335 | 0.0454 | -0.0354  | 0.0332 |
| 2 | 114082175 | rs62158170  | A | G | 0.2939  | 0.0563 | 0.1836   | 0.0332 |
| 2 | 121440218 | rs10864859  | T | G | 0.3737  | 0.0886 | 0.286    | 0.0521 |
| 2 | 122000745 | rs6723509   | T | C | 0.2018  | 0.0588 | 0.1046   | 0.0432 |
| 2 | 127183454 | rs13001283  | A | G | 0.1232  | 0.0564 | 0.1484   | 0.0414 |
| 2 | 135632981 | rs4954192   | T | C | -0.1862 | 0.0481 | -0.1111  | 0.0284 |
| 2 | 138421227 | rs72844590  | T | G | 0.1893  | 0.0627 | 0.0179   | 0.0457 |
| 2 | 144146311 | rs7606205   | A | C | -0.1378 | 0.046  | -0.0994  | 0.0337 |
| 2 | 145646072 | rs1438896   | T | C | 0.2275  | 0.05   | 0.1912   | 0.0294 |
| 2 | 146272860 | rs34570306  | T | C | -0.1363 | 0.0433 | -0.0851  | 0.0317 |
| 2 | 146950908 | rs62169544  | A | G | -0.1318 | 0.0466 | -0.1101  | 0.0274 |
| 2 | 148572160 | rs12990959  | T | C | -0.1368 | 0.0498 | -0.1197  | 0.0293 |
| 2 | 152978341 | rs4664080   | A | G | -0.0883 | 0.0436 | 0.0334   | 0.032  |
| 2 | 153618773 | rs3175      | A | G | 0.1549  | 0.0501 | 0.0465   | 0.0295 |
| 2 | 161368213 | rs79523138  | A | G | -0.301  | 0.0731 | -0.0544  | 0.0535 |
| 2 | 162278233 | rs55732192  | T | G | -0.2807 | 0.0798 | -0.1224  | 0.047  |
| 2 | 164963486 | rs1446468   | T | C | -0.487  | 0.0468 | -0.2625  | 0.0275 |
| 2 | 165557318 | rs6712203   | T | C | -0.1943 | 0.0477 | -0.1137  | 0.0281 |
| 2 | 166250129 | rs2390258   | A | G | -0.1137 | 0.0448 | -0.1132  | 0.0329 |
| 2 | 169763148 | rs560887    | T | C | -0.078  | 0.0451 | 0.0362   | 0.0331 |
| 2 | 172381487 | rs151054210 | A | G | 0.073   | 0.0544 | -0.0809  | 0.0399 |
| 2 | 173965056 | rs6758859   | T | C | 0.0481  | 0.0477 | 0.098    | 0.028  |
| 2 | 174949358 | rs11694601  | A | G | -0.1422 | 0.047  | -0.0818  | 0.0277 |
| 2 | 179786068 | rs79146658  | T | C | -0.0045 | 0.086  | -0.2819  | 0.0505 |
| 2 | 180739450 | rs1486236   | A | C | -0.1058 | 0.0445 | 0.0044   | 0.0326 |
| 2 | 183224127 | rs16823124  | A | G | 0.2319  | 0.0497 | 0.1804   | 0.0292 |
| 2 | 187816321 | rs28558491  | T | C | -0.1419 | 0.0473 | -0.055   | 0.0347 |
| 2 | 189643316 | rs11901929  | A | G | 0.0938  | 0.0449 | -0.0057  | 0.0329 |
| 2 | 191439591 | rs7592578   | T | G | -0.3414 | 0.0603 | -0.1875  | 0.0354 |
| 2 | 201102905 | rs296797    | T | C | 0.2067  | 0.0467 | 0.0629   | 0.0275 |
| 2 | 204125426 | rs1469760   | T | C | -0.1282 | 0.0425 | -0.0065  | 0.0311 |
| 2 | 205077128 | rs2162003   | T | C | 0.1652  | 0.0507 | 0.1002   | 0.0297 |

|   |           |             |   |   |         |        |         |        |
|---|-----------|-------------|---|---|---------|--------|---------|--------|
| 2 | 207996447 | rs1263671   | T | C | -0.1405 | 0.0645 | -0.1586 | 0.038  |
| 2 | 208526140 | rs55780018  | T | C | -0.3278 | 0.0488 | -0.1436 | 0.0286 |
| 2 | 211540507 | rs1047891   | A | C | -0.1647 | 0.0511 | -0.1028 | 0.0301 |
| 2 | 213188795 | rs12694277  | T | C | -0.1284 | 0.0462 | -0.0684 | 0.0338 |
| 2 | 217659266 | rs4674114   | A | G | -0.1366 | 0.0524 | -0.0322 | 0.0386 |
| 2 | 218668732 | rs1063281   | T | C | -0.2392 | 0.0483 | -0.1378 | 0.0283 |
| 2 | 219651349 | rs1996992   | T | G | -0.1292 | 0.0957 | -0.2953 | 0.0703 |
| 2 | 220362557 | rs12474050  | T | C | 0.0504  | 0.0486 | 0.1025  | 0.0286 |
| 2 | 227100698 | rs2972146   | T | G | 0.2486  | 0.0476 | 0.1395  | 0.0281 |
| 2 | 230629138 | rs1044822   | T | C | -0.1852 | 0.0608 | -0.0921 | 0.0446 |
| 2 | 238227594 | rs12052878  | A | G | -0.0697 | 0.0442 | 0.0231  | 0.0324 |
| 2 | 239864732 | rs4507125   | A | C | -0.1046 | 0.0554 | -0.1418 | 0.0326 |
| 2 | 242344695 | rs139354822 | T | C | 0.442   | 0.1248 | 0.3155  | 0.0906 |
| 3 | 7489993   | rs9865843   | A | G | -0.1161 | 0.0419 | -0.0856 | 0.0307 |
| 3 | 11290122  | rs347591    | T | G | 0.2842  | 0.0489 | 0.1472  | 0.0288 |
| 3 | 13826854  | rs729639    | T | C | -0.0663 | 0.0442 | 0.0498  | 0.0324 |
| 3 | 14958126  | rs11128722  | A | G | -0.2518 | 0.047  | -0.1189 | 0.0278 |
| 3 | 23163749  | rs4634143   | T | C | 0.0743  | 0.0469 | 0.1024  | 0.0343 |
| 3 | 27537909  | rs13082711  | T | C | -0.2805 | 0.0546 | -0.1835 | 0.032  |
| 3 | 36964583  | rs4678915   | A | G | -0.0851 | 0.0427 | 0.03    | 0.0313 |
| 3 | 37539090  | rs267517    | A | G | -0.0898 | 0.042  | 0.0053  | 0.0308 |
| 3 | 38767315  | rs6801957   | T | C | 0.0706  | 0.0418 | -0.0941 | 0.0306 |
| 3 | 41107173  | rs6788984   | A | G | 0.168   | 0.061  | 0.0388  | 0.0447 |
| 3 | 41912651  | rs9815354   | A | G | -0.0628 | 0.0629 | 0.3264  | 0.0371 |
| 3 | 44858131  | rs141979279 | T | C | 0.2648  | 0.0963 | -0.0948 | 0.0702 |
| 3 | 46861939  | rs113134141 | A | G | -0.1352 | 0.0687 | -0.1451 | 0.0504 |
| 3 | 48197614  | rs6797587   | A | G | -0.28   | 0.0495 | -0.2209 | 0.0291 |
| 3 | 49913705  | rs36022378  | T | C | -0.1561 | 0.06   | -0.1144 | 0.0353 |
| 3 | 52558008  | rs13303     | T | C | -0.1095 | 0.0473 | -0.0153 | 0.0278 |
| 3 | 53635595  | rs9810888   | T | G | -0.1507 | 0.0464 | -0.128  | 0.0273 |
| 3 | 56726646  | rs9827472   | T | C | -0.1639 | 0.0485 | -0.1426 | 0.0285 |
| 3 | 57706503  | rs12486605  | T | C | -0.0278 | 0.0421 | -0.122  | 0.0308 |
| 3 | 63856870  | rs3774702   | A | G | 0.098   | 0.0615 | 0.1692  | 0.0361 |
| 3 | 64710253  | rs918466    | A | G | -0.1387 | 0.0477 | -0.1637 | 0.0281 |
| 3 | 66427029  | rs7630745   | T | C | 0.1319  | 0.0438 | 0.009   | 0.0321 |
| 3 | 73260545  | rs729448    | A | G | -0.0769 | 0.0465 | 0.0029  | 0.0274 |
| 3 | 74710462  | rs9857362   | A | C | 0.1104  | 0.0418 | 0.011   | 0.0306 |
| 3 | 85656311  | rs1375564   | T | C | 0.1884  | 0.0439 | 0.0441  | 0.0322 |
| 3 | 99839106  | rs9860290   | A | G | -0.1488 | 0.0529 | -0.0168 | 0.0388 |
| 3 | 111500002 | rs28675079  | A | G | -0.2597 | 0.0583 | -0.1657 | 0.0344 |
| 3 | 114461208 | rs1882289   | A | G | -0.2289 | 0.064  | -0.141  | 0.0469 |
| 3 | 123049938 | rs6806529   | A | C | 0.2028  | 0.0477 | 0.0673  | 0.028  |
| 3 | 124557643 | rs6438857   | T | C | 0.0977  | 0.0427 | 0.0089  | 0.0313 |
| 3 | 128201889 | rs62270945  | T | C | 0.1575  | 0.1581 | -0.2206 | 0.0911 |
| 3 | 132780356 | rs9875380   | T | C | -0.1456 | 0.0421 | -0.0663 | 0.0308 |
| 3 | 133959552 | rs6783086   | T | C | 0.257   | 0.0468 | 0.146   | 0.0275 |
| 3 | 138119952 | rs2306374   | T | C | -0.2268 | 0.0628 | -0.1699 | 0.037  |
| 3 | 141134818 | rs16851397  | A | G | -0.5907 | 0.1135 | -0.4    | 0.0664 |
| 3 | 142631909 | rs62278541  | A | G | 0.1037  | 0.0441 | -0.0265 | 0.0323 |
| 3 | 149524692 | rs6772704   | A | C | -0.1138 | 0.0501 | 0.0019  | 0.0366 |
| 3 | 154707967 | rs143112823 | A | G | -0.4019 | 0.0949 | -0.1784 | 0.0552 |
| 3 | 158316726 | rs78151625  | T | C | -0.1451 | 0.0562 | -0.0583 | 0.0411 |
| 3 | 169100886 | rs419076    | T | C | 0.3947  | 0.0457 | 0.25    | 0.0269 |
| 3 | 171995605 | rs4894535   | T | C | 0.1221  | 0.0631 | -0.0105 | 0.0371 |
| 3 | 176927949 | rs73171158  | T | C | -0.2109 | 0.0499 | -0.0839 | 0.0293 |
| 3 | 179169230 | rs7611674   | T | G | 0.1299  | 0.0599 | 0.1549  | 0.0353 |
| 3 | 183435713 | rs262986    | A | G | -0.2288 | 0.0468 | -0.0673 | 0.0275 |
| 3 | 194299967 | rs1706003   | T | G | 0.096   | 0.0429 | 0.1576  | 0.0314 |
| 3 | 197070959 | rs6777317   | A | G | 0.1642  | 0.045  | 0.0855  | 0.033  |
| 4 | 1254930   | rs1250129   | A | G | -0.1673 | 0.0733 | 0.0096  | 0.043  |
| 4 | 2165493   | rs55829085  | A | C | -0.226  | 0.1039 | -0.219  | 0.0758 |
| 4 | 3451109   | rs2498323   | A | G | 0.1963  | 0.0703 | -0.1273 | 0.0518 |
| 4 | 15356795  | rs13122790  | A | G | 0.0677  | 0.0486 | -0.0515 | 0.0355 |
| 4 | 16032948  | rs11730129  | T | C | -0.2053 | 0.0561 | 0.0102  | 0.033  |
| 4 | 18008232  | rs2610990   | A | G | -0.1915 | 0.0484 | -0.0165 | 0.0355 |
| 4 | 38387395  | rs2291435   | T | C | -0.2419 | 0.0463 | -0.1349 | 0.0272 |
| 4 | 46595623  | rs12511987  | T | G | -0.1817 | 0.0551 | -0.0876 | 0.0402 |

|   |           |             |   |   |         |        |          |        |
|---|-----------|-------------|---|---|---------|--------|----------|--------|
| 4 | 54799245  | rs871606    | T | C | 0.3598  | 0.076  | -0.0896  | 0.0448 |
| 4 | 57943153  | rs1718845   | A | G | -0.0131 | 0.0453 | -0.0907  | 0.0332 |
| 4 | 77414144  | rs10008637  | T | C | 0.1355  | 0.0415 | 0.0972   | 0.0304 |
| 4 | 81164723  | rs1458038   | T | C | 0.6612  | 0.0507 | 0.4107   | 0.0298 |
| 4 | 83925895  | rs6823199   | T | C | 0.2267  | 0.0503 | 0.0734   | 0.0369 |
| 4 | 86715670  | rs2014912   | T | C | 0.5122  | 0.0644 | 0.1492   | 0.0379 |
| 4 | 89750668  | rs13149209  | T | C | 0.196   | 0.0496 | 0.054    | 0.0363 |
| 4 | 95938386  | rs1347345   | A | G | -0.1765 | 0.0433 | -0.1153  | 0.0317 |
| 4 | 102435265 | rs17248480  | A | G | -0.5467 | 0.1312 | -0.4718  | 0.0964 |
| 4 | 103188709 | rs13107325  | T | C | -0.8783 | 0.0947 | -0.6042  | 0.0556 |
| 4 | 103769304 | rs223361    | T | C | -0.043  | 0.0456 | 0.0942   | 0.0334 |
| 4 | 106109381 | rs4699165   | A | G | 0.083   | 0.0483 | -0.0456  | 0.0284 |
| 4 | 109017528 | rs7694643   | A | G | -0.183  | 0.0432 | -0.0874  | 0.0317 |
| 4 | 111381638 | rs6825911   | T | C | -0.2376 | 0.0576 | -0.1712  | 0.034  |
| 4 | 119958809 | rs4834735   | T | C | 0.1927  | 0.0676 | 0.104    | 0.0397 |
| 4 | 120509279 | rs66887589  | T | C | -0.1812 | 0.0463 | -0.1251  | 0.0272 |
| 4 | 138464842 | rs7439567   | T | C | 0.1998  | 0.0432 | 0.1216   | 0.0316 |
| 4 | 146821725 | rs4835266   | T | C | 0.0766  | 0.0445 | -0.0409  | 0.0326 |
| 4 | 148400256 | rs10305838  | T | C | -0.117  | 0.0607 | 0.0207   | 0.0445 |
| 4 | 151295085 | rs6823767   | T | C | -0.1566 | 0.0528 | -0.0839  | 0.031  |
| 4 | 156645513 | rs13139571  | A | C | -0.2959 | 0.0538 | -0.2307  | 0.0316 |
| 4 | 157678511 | rs17035181  | T | G | 0.271   | 0.0593 | 0.1245   | 0.0434 |
| 4 | 169688000 | rs869396    | A | C | -0.1803 | 0.0466 | -0.0079  | 0.0274 |
| 5 | 361148    | rs4957026   | A | G | 0.2214  | 0.0497 | 0.1048   | 0.0292 |
| 5 | 1279790   | rs10069690  | T | C | 0.2151  | 0.0468 | 0.118    | 0.0343 |
| 5 | 3706050   | rs954767    | A | C | -0.1658 | 0.0465 | -0.1074  | 0.034  |
| 5 | 32815028  | rs1173771   | A | G | -0.5227 | 0.0468 | -0.2582  | 0.0276 |
| 5 | 43824677  | rs7710854   | A | G | 0.254   | 0.0663 | 0.0439   | 0.0485 |
| 5 | 52135543  | rs6867399   | A | C | 0.0834  | 0.0542 | -0.0585  | 0.0396 |
| 5 | 55868097  | rs13179413  | T | C | 0.1656  | 0.0492 | 0.1214   | 0.0361 |
| 5 | 57095011  | rs12515541  | T | G | 0.2175  | 0.0431 | 0.0939   | 0.0316 |
| 5 | 57754005  | rs1848510   | A | G | 0.1129  | 0.0486 | 0.0736   | 0.0286 |
| 5 | 61553881  | rs10062049  | T | C | 0.1849  | 0.0611 | 0.1821   | 0.0447 |
| 5 | 65662133  | rs3121685   | T | C | -0.1302 | 0.0422 | -0.0592  | 0.0309 |
| 5 | 66291370  | rs4286632   | A | G | 0.148   | 0.0471 | 0.1548   | 0.0345 |
| 5 | 68007803  | rs246973    | T | C | 0.1721  | 0.0499 | 0.0796   | 0.0365 |
| 5 | 71506529  | rs72761109  | T | C | 0.0874  | 0.0474 | -0.0216  | 0.0347 |
| 5 | 72654304  | rs4443403   | T | C | -0.1725 | 0.0687 | -0.0286  | 0.0502 |
| 5 | 75038431  | rs10078021  | T | G | -0.0619 | 0.0489 | -0.1218  | 0.0288 |
| 5 | 77837789  | rs10057188  | A | G | -0.1942 | 0.0475 | -0.0671  | 0.028  |
| 5 | 87514515  | rs10059921  | T | G | -0.3732 | 0.0919 | -0.219   | 0.0542 |
| 5 | 89484911  | rs62380354  | A | C | 0.2183  | 0.0833 | 0.1982   | 0.0484 |
| 5 | 96174186  | rs709668    | A | G | -0.1743 | 0.0524 | -0.131   | 0.0384 |
| 5 | 97953719  | rs1871190   | T | G | 0.1658  | 0.0495 | 0.1062   | 0.0291 |
| 5 | 107458637 | rs286809    | A | G | -0.181  | 0.0563 | -0.0172  | 0.0412 |
| 5 | 108113740 | rs79409628  | T | G | -0.265  | 0.0744 | 0.0957   | 0.0544 |
| 5 | 114390121 | rs10077885  | A | C | -0.2465 | 0.0484 | -0.1321  | 0.0285 |
| 5 | 119781569 | rs1432457   | A | G | -0.1559 | 0.0461 | -0.0368  | 0.0338 |
| 5 | 121194226 | rs9885577   | T | C | 0.1325  | 0.0446 | 0.0433   | 0.0327 |
| 5 | 122476457 | rs13359291  | A | G | 0.4005  | 0.062  | 0.1614   | 0.0366 |
| 5 | 123136656 | rs6891344   | A | G | 0.284   | 0.0599 | 0.2182   | 0.0354 |
| 5 | 127868199 | rs6595838   | A | G | 0.2361  | 0.0507 | 0.1216   | 0.0297 |
| 5 | 131784393 | rs12521868  | T | G | -0.123  | 0.0476 | -0.1463  | 0.028  |
| 5 | 132397351 | rs55747751  | A | G | -0.1589 | 0.0792 | -0.1912  | 0.0581 |
| 5 | 140086677 | rs702395    | T | C | 0.115   | 0.0416 | 0.0223   | 0.0305 |
| 5 | 147696018 | rs2400509   | A | G | -0.1076 | 0.0524 | 1.00E-04 | 0.0308 |
| 5 | 148391140 | rs9687065   | A | G | 0.2501  | 0.059  | 0.1789   | 0.0348 |
| 5 | 157845402 | rs11953630  | T | C | -0.4463 | 0.0501 | -0.2185  | 0.0295 |
| 5 | 172192350 | rs114503346 | T | C | -0.1495 | 0.1198 | -0.276   | 0.0698 |
| 5 | 176731452 | rs28362590  | T | G | 0.1061  | 0.0548 | 0.1196   | 0.0322 |
| 5 | 179411477 | rs12153395  | A | G | -0.2602 | 0.0764 | -0.0841  | 0.0449 |
| 6 | 1613686   | rs2745599   | A | G | 0.1464  | 0.0418 | 0.055    | 0.0306 |
| 6 | 7211818   | rs1334576   | A | G | -0.0736 | 0.0416 | 0.0436   | 0.0305 |
| 6 | 12295987  | rs1630736   | T | C | -0.1846 | 0.042  | -0.0401  | 0.0308 |
| 6 | 12903957  | rs9349379   | A | G | 0.2624  | 0.0485 | 0.0727   | 0.0285 |
| 6 | 19028623  | rs12216497  | T | C | 0.1211  | 0.0461 | 0.003    | 0.0272 |
| 6 | 20686996  | rs9368222   | A | C | 0.2337  | 0.0462 | 0.0448   | 0.0338 |

|   |           |             |   |   |         |        |          |        |
|---|-----------|-------------|---|---|---------|--------|----------|--------|
| 6 | 22130601  | rs6911827   | T | C | 0.152   | 0.0473 | 0.12     | 0.0279 |
| 6 | 31708147  | rs409558    | T | C | 0.4456  | 0.0637 | 0.1347   | 0.0377 |
| 6 | 34244132  | rs115245297 | T | C | -0.5045 | 0.1111 | -0.3259  | 0.0816 |
| 6 | 43308363  | rs1563788   | T | C | 0.3062  | 0.0501 | 0.1301   | 0.0295 |
| 6 | 43809802  | rs9472135   | T | C | 0.0094  | 0.0455 | 0.1126   | 0.0333 |
| 6 | 50683009  | rs78648104  | T | C | -0.3571 | 0.083  | -0.1824  | 0.049  |
| 6 | 51832494  | rs13205180  | T | C | 0.041   | 0.0464 | 0.1195   | 0.0273 |
| 6 | 53994626  | rs631441    | T | G | -0.0462 | 0.0449 | 0.0537   | 0.0329 |
| 6 | 56102780  | rs1925153   | T | C | -0.0511 | 0.0492 | 0.0724   | 0.0288 |
| 6 | 72206620  | rs504691    | A | C | -0.0098 | 0.047  | -0.0817  | 0.0277 |
| 6 | 73657714  | rs12195276  | T | C | -0.1819 | 0.0471 | 0.009    | 0.0345 |
| 6 | 79655477  | rs10943605  | A | G | 0.1747  | 0.0462 | 0.1552   | 0.0272 |
| 6 | 80818531  | rs7753695   | T | C | 0.1176  | 0.0476 | 0.098    | 0.028  |
| 6 | 82281417  | rs9449350   | T | C | -0.2333 | 0.0488 | -0.1346  | 0.0287 |
| 6 | 85283253  | rs60255247  | A | C | 0.0788  | 0.0757 | -0.0474  | 0.0445 |
| 6 | 96885405  | rs35410524  | T | C | 0.2999  | 0.0588 | 0.1412   | 0.0347 |
| 6 | 109013930 | rs9486916   | T | C | 0.2572  | 0.058  | 0.066    | 0.0341 |
| 6 | 117523671 | rs2693560   | A | G | -0.1978 | 0.0448 | -0.1391  | 0.0329 |
| 6 | 118026126 | rs2498586   | T | C | -0.1617 | 0.0568 | -0.0919  | 0.0416 |
| 6 | 119113317 | rs9401090   | T | C | 0.1762  | 0.0494 | 0.0842   | 0.0362 |
| 6 | 121781390 | rs11154027  | T | C | -0.009  | 0.0475 | -0.0655  | 0.0279 |
| 6 | 122287990 | rs6925750   | T | C | 0.0726  | 0.0637 | -0.0916  | 0.0466 |
| 6 | 126228512 | rs10782230  | A | G | 0.1776  | 0.0425 | 0.0548   | 0.0311 |
| 6 | 127115454 | rs13209747  | T | C | 0.4117  | 0.0466 | 0.2542   | 0.0274 |
| 6 | 131311909 | rs9885632   | T | C | 0.1582  | 0.0486 | 0.0261   | 0.0357 |
| 6 | 135119089 | rs4896104   | T | C | -0.0999 | 0.0433 | 0.0606   | 0.0317 |
| 6 | 139835689 | rs668459    | T | C | -0.1357 | 0.0419 | -0.1487  | 0.0307 |
| 6 | 140383733 | rs7763294   | T | G | -0.1418 | 0.045  | -0.046   | 0.0329 |
| 6 | 147713764 | rs7765526   | A | G | 0.2317  | 0.047  | 0.1251   | 0.0277 |
| 6 | 152398505 | rs9479200   | A | G | -0.0985 | 0.0709 | 0.1494   | 0.0418 |
| 6 | 153427265 | rs9479509   | A | G | -0.1242 | 0.0497 | -0.0953  | 0.0293 |
| 6 | 154418759 | rs598682    | A | G | -0.155  | 0.0476 | -0.1398  | 0.0349 |
| 6 | 160769423 | rs555754    | A | G | -0.1895 | 0.0459 | -0.0505  | 0.027  |
| 6 | 161712235 | rs9456648   | T | C | -0.2089 | 0.0492 | -0.1459  | 0.029  |
| 6 | 169587103 | rs1322639   | A | G | 0.0888  | 0.0557 | -0.1312  | 0.0328 |
| 7 | 1195692   | rs73033340  | A | G | 0.3412  | 0.1287 | 0.2476   | 0.092  |
| 7 | 1966831   | rs6959688   | A | G | -0.1323 | 0.0437 | -0.0421  | 0.032  |
| 7 | 2512545   | rs2969070   | A | G | -0.2752 | 0.0478 | -0.198   | 0.0281 |
| 7 | 4669949   | rs73049928  | A | G | -0.1323 | 0.0541 | -0.1084  | 0.0396 |
| 7 | 7290732   | rs1468520   | A | G | -0.1466 | 0.0615 | -0.1269  | 0.0362 |
| 7 | 14375977  | rs13240040  | A | G | 0.1457  | 0.0518 | 0.1161   | 0.0304 |
| 7 | 19049388  | rs2107595   | A | G | 0.3022  | 0.0623 | -0.0518  | 0.0367 |
| 7 | 25871109  | rs1055144   | T | C | 0.108   | 0.0582 | 2.00E-04 | 0.0342 |
| 7 | 28142088  | rs10274928  | A | G | 0.1505  | 0.0411 | 0.0515   | 0.0302 |
| 7 | 28658522  | rs917275    | A | G | -0.1133 | 0.0478 | 0.0351   | 0.0282 |
| 7 | 35467896  | rs342989    | A | G | 0.0588  | 0.0557 | 0.1161   | 0.0328 |
| 7 | 36225818  | rs2052263   | A | G | 0.2349  | 0.0787 | 0.0171   | 0.0458 |
| 7 | 40447971  | rs76206723  | A | G | -0.3356 | 0.0744 | -0.0328  | 0.0438 |
| 7 | 44240407  | rs1004558   | T | C | 0.1803  | 0.0552 | -0.0237  | 0.0406 |
| 7 | 45036785  | rs73105827  | T | G | -0.1782 | 0.0864 | -0.1437  | 0.0508 |
| 7 | 46008110  | rs11977526  | A | G | -0.2535 | 0.0484 | 0.0511   | 0.0285 |
| 7 | 46554358  | rs71543920  | T | G | -0.2962 | 0.0927 | 0.0359   | 0.068  |
| 7 | 47548893  | rs12668436  | T | C | -0.1554 | 0.0534 | -0.0026  | 0.0314 |
| 7 | 50915776  | rs17454517  | A | G | 0.0718  | 0.0466 | 0.1276   | 0.0274 |
| 7 | 69769369  | rs2222544   | T | C | -0.0333 | 0.0482 | -0.094   | 0.0353 |
| 7 | 73491212  | rs1091811   | A | G | -0.0775 | 0.0625 | 0.0394   | 0.0367 |
| 7 | 74107374  | rs34324971  | A | G | 0.0828  | 0.0532 | 0.1341   | 0.039  |
| 7 | 75097488  | rs6963105   | A | G | -0.1548 | 0.046  | -0.0939  | 0.0336 |
| 7 | 77572461  | rs848445    | T | C | -0.196  | 0.049  | -0.0322  | 0.0359 |
| 7 | 89805241  | rs11770630  | T | C | 0.0556  | 0.0413 | -0.1108  | 0.0303 |
| 7 | 90449362  | rs10245696  | A | C | 0.105   | 0.0468 | -0.0135  | 0.0275 |
| 7 | 92264410  | rs2282978   | T | C | 0.0704  | 0.0487 | -0.0518  | 0.0288 |
| 7 | 96461649  | rs1947228   | T | C | -0.0432 | 0.0414 | -0.146   | 0.0304 |
| 7 | 100467700 | rs12705090  | T | C | -0.077  | 0.0525 | 0.1183   | 0.0384 |
| 7 | 106411858 | rs17477177  | T | C | -0.5642 | 0.0564 | -0.0153  | 0.0332 |
| 7 | 107019947 | rs115172170 | T | C | -0.3593 | 0.0887 | -0.0856  | 0.0648 |
| 7 | 116198621 | rs1997571   | A | G | -0.0912 | 0.042  | 0.0414   | 0.0308 |

|   |           |             |   |   |         |        |         |        |
|---|-----------|-------------|---|---|---------|--------|---------|--------|
| 7 | 128573967 | rs4728142   | A | G | -0.2155 | 0.0467 | -0.0752 | 0.0275 |
| 7 | 129663496 | rs11556924  | T | C | -0.2487 | 0.0498 | -0.142  | 0.0293 |
| 7 | 130432469 | rs34072724  | A | G | -0.1735 | 0.0412 | -0.0784 | 0.0302 |
| 7 | 131059056 | rs13238550  | A | G | 0.1695  | 0.0472 | 0.0892  | 0.0277 |
| 7 | 140238048 | rs12703989  | A | G | 0.1501  | 0.0436 | 0.0621  | 0.0319 |
| 7 | 149474622 | rs73727605  | A | G | 0.3034  | 0.0994 | 0.0601  | 0.0585 |
| 7 | 150050111 | rs11771693  | A | G | 0.1368  | 0.0455 | 0.0328  | 0.0333 |
| 7 | 150690176 | rs3918226   | T | C | 0.5473  | 0.091  | 0.5454  | 0.0534 |
| 7 | 150704843 | rs891511    | A | G | -0.2529 | 0.0521 | -0.2109 | 0.0306 |
| 7 | 151415041 | rs10224002  | A | G | -0.2375 | 0.0525 | -0.1368 | 0.031  |
| 7 | 156311745 | rs9638084   | A | G | 0.1369  | 0.0429 | 0.0959  | 0.0314 |
| 8 | 1721090   | rs4875958   | A | G | 0.2209  | 0.0515 | 0.0898  | 0.0304 |
| 8 | 8503700   | rs61040371  | T | C | 0.191   | 0.0475 | 0.0801  | 0.0279 |
| 8 | 9730663   | rs62491354  | A | G | 0.1582  | 0.0608 | 0.103   | 0.0445 |
| 8 | 10268736  | rs1986971   | A | G | 0.1991  | 0.0478 | 0.0754  | 0.035  |
| 8 | 11433909  | rs2898290   | T | C | 0.3419  | 0.0466 | 0.1324  | 0.0274 |
| 8 | 17427186  | rs75902664  | A | G | -0.1995 | 0.171  | -0.3143 | 0.0989 |
| 8 | 22428708  | rs1047030   | A | G | 0.1866  | 0.0591 | 0.1383  | 0.0431 |
| 8 | 23400615  | rs62503324  | T | C | 0.1569  | 0.0474 | 0.1635  | 0.0347 |
| 8 | 25900675  | rs6557876   | T | C | -0.3667 | 0.0533 | -0.1966 | 0.0314 |
| 8 | 26445194  | rs17321041  | T | C | 0.3664  | 0.0971 | 0.2722  | 0.0569 |
| 8 | 30288272  | rs2979470   | T | C | 0.2114  | 0.046  | 0.1003  | 0.027  |
| 8 | 33309993  | rs7845722   | A | G | -0.1209 | 0.0467 | -0.0068 | 0.0275 |
| 8 | 38130025  | rs1906672   | A | G | 0.2227  | 0.0499 | 0.0752  | 0.0366 |
| 8 | 42324765  | rs2978456   | T | C | -0.1069 | 0.0498 | -0.0121 | 0.0291 |
| 8 | 51947549  | rs4873492   | T | C | 0.2131  | 0.0584 | 0.1059  | 0.0427 |
| 8 | 60535824  | rs6996733   | T | C | 0.1484  | 0.0568 | 0.0656  | 0.0416 |
| 8 | 64501744  | rs2354862   | A | C | 0.2139  | 0.0485 | 0.0939  | 0.0285 |
| 8 | 68920135  | rs13253358  | T | C | 0.1945  | 0.0504 | 0.123   | 0.0296 |
| 8 | 76054904  | rs1350100   | A | G | 0.0382  | 0.043  | -0.0591 | 0.0315 |
| 8 | 76591880  | rs1449544   | A | C | 0.2215  | 0.0459 | 0.0368  | 0.027  |
| 8 | 81393697  | rs72688070  | T | C | -0.187  | 0.0549 | -0.1213 | 0.0403 |
| 8 | 82814156  | rs56345595  | A | G | 0.1538  | 0.043  | 0.0614  | 0.0315 |
| 8 | 92149429  | rs7009170   | T | C | -0.0775 | 0.0451 | 0.0529  | 0.0331 |
| 8 | 92769569  | rs62526122  | A | G | 0.1739  | 0.0557 | 0.1116  | 0.0326 |
| 8 | 95969257  | rs4582532   | A | G | -0.091  | 0.0411 | 0.0126  | 0.0301 |
| 8 | 101676675 | rs2978098   | A | C | 0.1483  | 0.0474 | 0.1223  | 0.0279 |
| 8 | 102750597 | rs142449193 | T | C | -0.4354 | 0.112  | -0.2426 | 0.0663 |
| 8 | 103883630 | rs2513877   | A | G | -0.1413 | 0.0576 | -0.1107 | 0.034  |
| 8 | 105966258 | rs35783704  | A | G | -0.5219 | 0.0773 | -0.241  | 0.0454 |
| 8 | 110107161 | rs28499085  | A | G | 0.1426  | 0.0486 | 0.0319  | 0.0355 |
| 8 | 116959837 | rs2205260   | A | C | 0.0555  | 0.0559 | -0.085  | 0.0409 |
| 8 | 120435812 | rs2071518   | T | C | 0.2181  | 0.0524 | -0.1409 | 0.0308 |
| 8 | 126520544 | rs62523863  | A | G | 0.1643  | 0.0502 | 0.0686  | 0.0368 |
| 8 | 129483956 | rs4598218   | T | C | 0.1578  | 0.0435 | 0.0308  | 0.0318 |
| 8 | 135612745 | rs894344    | A | G | -0.1455 | 0.0465 | -0.0915 | 0.0274 |
| 8 | 141060027 | rs4454254   | A | G | -0.2213 | 0.0475 | -0.0186 | 0.028  |
| 8 | 141858620 | rs10087782  | T | C | 0.14    | 0.0418 | 0.0872  | 0.0306 |
| 8 | 142367087 | rs34591516  | T | C | 0.5607  | 0.1067 | 0.2869  | 0.0632 |
| 8 | 143312933 | rs4129585   | A | C | 0.1541  | 0.0414 | 0.0872  | 0.0303 |
| 8 | 144060955 | rs62524579  | A | G | -0.1811 | 0.0533 | -0.1504 | 0.0309 |
| 8 | 144981488 | rs56233017  | A | G | -0.1275 | 0.1115 | -0.2413 | 0.0815 |
| 9 | 753648    | rs60191654  | A | G | -0.2311 | 0.0584 | -0.1328 | 0.0348 |
| 9 | 2493751   | rs12216886  | T | G | 0.1226  | 0.057  | 0.0949  | 0.0341 |
| 9 | 9350706   | rs1332813   | T | C | 0.1453  | 0.046  | 0.132   | 0.0337 |
| 9 | 10594635  | rs35287509  | T | C | -0.2083 | 0.0489 | -0.1218 | 0.0292 |
| 9 | 16872323  | rs11789875  | A | G | 0.1265  | 0.0596 | -0.0413 | 0.0436 |
| 9 | 19057551  | rs4977492   | T | C | -0.0939 | 0.0444 | 0.0177  | 0.0326 |
| 9 | 21801530  | rs4364717   | A | G | -0.1065 | 0.0455 | -0.0855 | 0.0272 |
| 9 | 22942770  | rs9886665   | T | C | 0.1887  | 0.0519 | 0.1087  | 0.031  |
| 9 | 34223553  | rs4553000   | T | C | -0.1627 | 0.0452 | -0.0405 | 0.027  |
| 9 | 35906471  | rs76452347  | T | C | -0.172  | 0.0624 | -0.1691 | 0.0372 |
| 9 | 85128518  | rs11139596  | T | G | -0.1876 | 0.0574 | -0.0031 | 0.0342 |
| 9 | 89888472  | rs11141731  | T | C | -0.1955 | 0.0549 | -0.1315 | 0.0328 |
| 9 | 101739709 | rs10988442  | A | G | 0.1174  | 0.0428 | -0.056  | 0.0313 |
| 9 | 112358150 | rs7043304   | T | C | 0.0488  | 0.0657 | 0.1218  | 0.0392 |
| 9 | 113169775 | rs111245230 | T | C | -0.6917 | 0.1299 | -0.4    | 0.0777 |

|    |           |             |   |   |         |        |         |        |
|----|-----------|-------------|---|---|---------|--------|---------|--------|
| 9  | 116696625 | rs13290326  | T | C | -0.162  | 0.0428 | -0.0461 | 0.0313 |
| 9  | 118534500 | rs10982910  | T | G | -0.2591 | 0.0725 | -0.0164 | 0.0532 |
| 9  | 119312256 | rs1861881   | T | G | 0.0717  | 0.0486 | 0.0862  | 0.029  |
| 9  | 123640500 | rs1953126   | T | C | 0.1838  | 0.0478 | 0.0141  | 0.0286 |
| 9  | 125755571 | rs10818775  | T | C | -0.2731 | 0.0696 | -0.0256 | 0.0416 |
| 9  | 127900996 | rs72765298  | T | C | -0.3477 | 0.0726 | -0.0413 | 0.0432 |
| 9  | 128498594 | rs7023828   | T | C | -0.2125 | 0.0427 | -0.0369 | 0.0312 |
| 9  | 130309028 | rs1891730   | T | C | -0.1733 | 0.0441 | -0.1081 | 0.0323 |
| 9  | 131210410 | rs7869756   | A | G | -0.0479 | 0.0552 | 0.0769  | 0.0404 |
| 9  | 131940019 | rs184457    | A | G | -0.1527 | 0.0494 | -0.0698 | 0.0361 |
| 9  | 136137065 | rs687621    | A | G | 0.0979  | 0.0484 | 0.1327  | 0.029  |
| 9  | 136522274 | rs6271      | T | C | -0.4339 | 0.102  | -0.3647 | 0.0613 |
| 9  | 139520789 | rs11145807  | A | G | 0.1532  | 0.0522 | 0.1429  | 0.0306 |
| 10 | 5804865   | rs56352451  | T | C | 0.1563  | 0.0603 | 0.0143  | 0.0442 |
| 10 | 10876943  | rs36006409  | T | G | -0.2507 | 0.0553 | -0.0313 | 0.0405 |
| 10 | 13523937  | rs10906391  | T | C | 0.1366  | 0.0452 | 0.0976  | 0.0331 |
| 10 | 18707448  | rs1813353   | T | C | 0.4324  | 0.0482 | 0.2772  | 0.0284 |
| 10 | 20531420  | rs72795925  | T | C | 0.0842  | 0.0498 | -0.0388 | 0.0365 |
| 10 | 21037294  | rs10732433  | T | C | 0.1051  | 0.0423 | -0.0558 | 0.031  |
| 10 | 28924901  | rs1265842   | T | C | 0.1634  | 0.0464 | 0.1444  | 0.0273 |
| 10 | 30317073  | rs9337951   | A | G | 0.0928  | 0.0528 | -0.1128 | 0.031  |
| 10 | 32082658  | rs10826995  | T | C | -0.0896 | 0.0514 | 0.0207  | 0.0302 |
| 10 | 32590362  | rs76164690  | T | G | -0.1393 | 0.0682 | -0.1702 | 0.0398 |
| 10 | 45273079  | rs2246438   | A | G | -0.0217 | 0.0512 | -0.0714 | 0.0301 |
| 10 | 48411796  | rs34130368  | T | G | -0.2205 | 0.0647 | -0.1209 | 0.0476 |
| 10 | 62390726  | rs10761530  | T | C | 0.2533  | 0.0455 | 0.1421  | 0.0268 |
| 10 | 63524591  | rs1530440   | T | C | -0.4983 | 0.0587 | -0.3586 | 0.0345 |
| 10 | 65335315  | rs7090758   | T | C | -0.1248 | 0.0426 | -0.0755 | 0.0312 |
| 10 | 69350563  | rs7914287   | T | C | -0.1487 | 0.0559 | -0.0017 | 0.0329 |
| 10 | 69855363  | rs10823136  | T | C | -0.3274 | 0.0857 | -0.1161 | 0.0508 |
| 10 | 70404159  | rs10998362  | T | C | 0.0609  | 0.0531 | -0.0543 | 0.0311 |
| 10 | 74751579  | rs12572586  | T | C | -0.3177 | 0.0874 | -0.2126 | 0.0639 |
| 10 | 82215288  | rs10887914  | T | C | 0.1523  | 0.0412 | 0.0465  | 0.0302 |
| 10 | 89681688  | rs77413490  | T | G | 0.522   | 0.1091 | 0.1808  | 0.0795 |
| 10 | 94468685  | rs11187142  | T | C | 0.298   | 0.0763 | 0.0721  | 0.0447 |
| 10 | 95895940  | rs932764    | A | G | -0.3654 | 0.0467 | -0.148  | 0.0275 |
| 10 | 96563757  | rs4494250   | A | G | 0.2561  | 0.0486 | 0.1767  | 0.0286 |
| 10 | 102075479 | rs603424    | A | G | 0.1454  | 0.0574 | 0.1518  | 0.0421 |
| 10 | 102604514 | rs112184198 | A | G | -0.5331 | 0.0761 | -0.3003 | 0.0448 |
| 10 | 103115345 | rs72847884  | A | G | 0.2555  | 0.1182 | 0.3526  | 0.0691 |
| 10 | 103702763 | rs11191156  | A | G | -0.0829 | 0.0484 | 0.0237  | 0.0285 |
| 10 | 104846178 | rs11191548  | T | C | 1.0233  | 0.0818 | 0.4546  | 0.0482 |
| 10 | 105677897 | rs4387287   | A | C | 0.1953  | 0.0624 | 0.1671  | 0.0368 |
| 10 | 106894942 | rs191784289 | T | C | 1.1113  | 0.2324 | 0.802   | 0.135  |
| 10 | 111965826 | rs111777102 | T | C | 0.1692  | 0.0933 | 0.1923  | 0.0552 |
| 10 | 114754071 | rs34872471  | T | C | -0.1796 | 0.0509 | -0.0066 | 0.03   |
| 10 | 115781527 | rs2782980   | T | C | -0.3388 | 0.0521 | -0.2424 | 0.0307 |
| 10 | 118523933 | rs11197813  | A | G | -0.1765 | 0.046  | -0.0517 | 0.0338 |
| 10 | 121433675 | rs72842207  | T | C | -0.0249 | 0.0509 | -0.211  | 0.0373 |
| 10 | 122968964 | rs11592107  | A | G | 0.2721  | 0.0495 | 0.112   | 0.0292 |
| 10 | 124235226 | rs72834453  | T | G | -0.2378 | 0.0712 | -0.0932 | 0.0421 |
| 10 | 126712781 | rs4411245   | A | G | 0.1204  | 0.0457 | 0.1317  | 0.0335 |
| 10 | 134459388 | rs1133400   | A | G | -0.193  | 0.051  | -0.051  | 0.0374 |
| 11 | 828916    | rs7126805   | A | G | 0.1195  | 0.0555 | -0.0099 | 0.0326 |
| 11 | 1905292   | rs661348    | T | C | -0.3417 | 0.0502 | -0.1612 | 0.0293 |
| 11 | 4673788   | rs17224476  | A | G | 0.1437  | 0.0668 | 0.1389  | 0.0492 |
| 11 | 6289118   | rs2929184   | A | G | 0.1035  | 0.0528 | 0.1397  | 0.0386 |
| 11 | 8252853   | rs110419    | A | G | 0.0808  | 0.047  | 0.1167  | 0.0276 |
| 11 | 8774923   | rs10743086  | A | G | -0.14   | 0.0522 | -0.0665 | 0.0382 |
| 11 | 9762274   | rs360153    | T | C | -0.186  | 0.0423 | -0.1036 | 0.031  |
| 11 | 10350538  | rs7129220   | A | G | 0.3919  | 0.0724 | 0.1886  | 0.0426 |
| 11 | 13293905  | rs900145    | T | C | 0.1135  | 0.0499 | 0.1191  | 0.0294 |
| 11 | 16302939  | rs4757391   | T | C | -0.4921 | 0.0573 | -0.2997 | 0.0337 |
| 11 | 16902268  | rs381815    | T | C | 0.3644  | 0.0515 | 0.2043  | 0.0303 |
| 11 | 17409572  | rs5219      | T | C | 0.32    | 0.0471 | 0.1578  | 0.0278 |
| 11 | 22515533  | rs11026586  | A | G | 0.1523  | 0.0845 | 0.1672  | 0.0613 |
| 11 | 27728102  | rs11030119  | A | G | -0.1699 | 0.0509 | -0.1332 | 0.03   |



|    |           |             |   |   |         |        |         |        |
|----|-----------|-------------|---|---|---------|--------|---------|--------|
| 11 | 28512458  | rs871004    | A | G | 0.1329  | 0.0447 | 0.0638  | 0.0327 |
| 11 | 30355707  | rs11031051  | A | C | -0.127  | 0.0445 | -0.0903 | 0.0326 |
| 11 | 31111810  | rs919045    | T | C | 0.0636  | 0.0473 | 0.0801  | 0.0279 |
| 11 | 32374199  | rs4922591   | T | C | -0.2058 | 0.0478 | -0.056  | 0.0281 |
| 11 | 34068037  | rs190194639 | T | C | 0.2211  | 0.0802 | 0.199   | 0.0584 |
| 11 | 45207851  | rs7480089   | A | G | -0.2334 | 0.0716 | -0.0146 | 0.0422 |
| 11 | 47461783  | rs7103648   | A | G | -0.3102 | 0.0474 | -0.1879 | 0.0279 |
| 11 | 47587452  | rs11537751  | T | C | 0.3936  | 0.1076 | 0.2114  | 0.0628 |
| 11 | 55113534  | rs75905900  | A | C | 0.328   | 0.0647 | 0.1726  | 0.0474 |
| 11 | 57496820  | rs11607056  | T | C | -0.1143 | 0.0437 | 0.0248  | 0.032  |
| 11 | 58207203  | rs11229457  | T | C | -0.2886 | 0.0563 | -0.1588 | 0.0332 |
| 11 | 61278246  | rs751984    | T | C | 0.4344  | 0.0738 | 0.3632  | 0.0434 |
| 11 | 63744609  | rs4980515   | T | C | 0.1722  | 0.0447 | 0.0748  | 0.0327 |
| 11 | 65408937  | rs3741378   | T | C | -0.4169 | 0.0696 | -0.1823 | 0.0409 |
| 11 | 69079707  | rs67330701  | T | C | -0.2769 | 0.0913 | -0.231  | 0.0534 |
| 11 | 70005641  | rs875106    | A | G | 0.0636  | 0.0422 | -0.0858 | 0.0309 |
| 11 | 72006086  | rs504217    | T | C | 0.462   | 0.0887 | 0.2777  | 0.0523 |
| 11 | 73068571  | rs2298807   | T | C | 0.1428  | 0.0556 | 0.1071  | 0.0326 |
| 11 | 74374950  | rs4420291   | A | G | 0.0716  | 0.0419 | 0.0832  | 0.0307 |
| 11 | 76125330  | rs7927515   | A | C | 0.1705  | 0.0488 | 0.0909  | 0.0288 |
| 11 | 77940075  | rs2450128   | A | G | -0.1589 | 0.0634 | -0.1535 | 0.0372 |
| 11 | 89224453  | rs2289125   | A | C | -0.1944 | 0.0582 | 0.079   | 0.0343 |
| 11 | 101100768 | rs61892344  | T | C | -0.1007 | 0.0554 | -0.1129 | 0.0405 |
| 11 | 102077200 | rs12807220  | A | G | -0.1028 | 0.0442 | 0.0699  | 0.0324 |
| 11 | 107096777 | rs4754196   | A | G | -0.1756 | 0.0415 | -0.1026 | 0.0304 |
| 11 | 116772441 | rs1076485   | T | C | 0.2665  | 0.0606 | 0.0826  | 0.0442 |
| 11 | 117283676 | rs8258      | T | C | 0.0559  | 0.0478 | -0.0868 | 0.0281 |
| 11 | 122521123 | rs12574332  | T | C | 0.2026  | 0.0703 | 0.1812  | 0.0413 |
| 12 | 2521579   | rs55935819  | A | G | 0.2044  | 0.0475 | 0.1222  | 0.0284 |
| 12 | 4328521   | rs117233107 | A | G | -0.4705 | 0.1829 | 0.1906  | 0.1344 |
| 12 | 5417856   | rs75507123  | T | G | -0.056  | 0.0632 | -0.1275 | 0.0464 |
| 12 | 8832203   | rs7132012   | A | G | 0.1114  | 0.0441 | 0.1229  | 0.0323 |
| 12 | 13860990  | rs28621435  | A | G | -0.3138 | 0.0729 | -0.1381 | 0.0436 |
| 12 | 15297359  | rs7313556   | A | G | 0.033   | 0.0443 | 0.0973  | 0.0325 |
| 12 | 20754154  | rs73080726  | T | C | -0.1147 | 0.0685 | 0.0425  | 0.0502 |
| 12 | 22015022  | rs704191    | T | C | 0.111   | 0.0428 | -0.047  | 0.0314 |
| 12 | 24210599  | rs7976167   | T | C | 0.1337  | 0.0465 | 0.0345  | 0.034  |
| 12 | 24770878  | rs17287293  | A | G | -0.0369 | 0.0637 | 0.1032  | 0.038  |
| 12 | 26438189  | rs6487543   | A | G | 0.1752  | 0.0563 | 0.1059  | 0.0336 |
| 12 | 27321112  | rs1098708   | A | G | -0.0695 | 0.042  | -0.0855 | 0.0308 |
| 12 | 27962103  | rs10842991  | T | C | -0.2145 | 0.0518 | 0.0016  | 0.0379 |
| 12 | 42540280  | rs7965392   | A | G | 0.1488  | 0.0473 | 0.1334  | 0.0283 |
| 12 | 49981722  | rs7977389   | T | C | 0.1642  | 0.0746 | 0.0799  | 0.0445 |
| 12 | 50537815  | rs7302981   | A | G | 0.3748  | 0.0461 | 0.2306  | 0.0275 |
| 12 | 50767037  | rs61926181  | A | G | -0.3336 | 0.1235 | -0.1357 | 0.0896 |
| 12 | 53440779  | rs73099903  | T | C | 0.4218  | 0.0878 | 0.2185  | 0.0521 |
| 12 | 54443090  | rs7297416   | A | C | 0.2816  | 0.05   | 0.1298  | 0.0299 |
| 12 | 57098040  | rs7137749   | T | C | 0.0294  | 0.0431 | 0.1039  | 0.0317 |
| 12 | 58003922  | rs10437954  | A | G | -0.2398 | 0.0697 | -0.106  | 0.051  |
| 12 | 67782397  | rs4143175   | T | C | 0.3055  | 0.0533 | 0.1375  | 0.0319 |
| 12 | 79685226  | rs7963801   | T | C | -0.1327 | 0.045  | -0.0536 | 0.0329 |
| 12 | 90060586  | rs17249754  | A | G | -0.8015 | 0.0619 | -0.4076 | 0.037  |
| 12 | 94882905  | rs76785029  | T | C | -0.0793 | 0.0973 | 0.1682  | 0.0581 |
| 12 | 95487226  | rs7977311   | T | C | -0.1237 | 0.0668 | 0.0872  | 0.049  |
| 12 | 96109855  | rs11108209  | T | C | -0.206  | 0.0797 | -0.1926 | 0.0476 |
| 12 | 96717095  | rs7134060   | A | G | -0.0603 | 0.0418 | -0.0816 | 0.0306 |
| 12 | 111281636 | rs12184466  | T | C | 0.2956  | 0.0695 | 0.2355  | 0.0413 |
| 12 | 111884608 | rs3184504   | T | C | 0.5774  | 0.0466 | 0.441   | 0.0278 |
| 12 | 115387796 | rs10850411  | T | C | 0.3036  | 0.0494 | 0.1856  | 0.0295 |
| 12 | 115552437 | rs35444     | A | G | 0.3321  | 0.0471 | 0.2201  | 0.0282 |
| 12 | 116198341 | rs11067763  | A | G | 0.1908  | 0.0753 | 0.1429  | 0.045  |
| 12 | 116699675 | rs11615689  | T | C | -0.0826 | 0.0576 | 0.0298  | 0.042  |
| 12 | 120813921 | rs3898618   | T | C | -0.2125 | 0.0952 | -0.2039 | 0.0699 |
| 12 | 122599796 | rs28498002  | T | C | -0.1264 | 0.0489 | -0.1267 | 0.0291 |
| 12 | 123806219 | rs1060105   | T | C | -0.1006 | 0.0572 | -0.1644 | 0.0342 |
| 12 | 124820705 | rs1271309   | A | G | -0.1743 | 0.0581 | -0.1177 | 0.0427 |
| 12 | 133086888 | rs117206641 | T | C | 0.3348  | 0.0783 | 0.2038  | 0.0464 |

|    |           |            |   |   |         |        |          |        |
|----|-----------|------------|---|---|---------|--------|----------|--------|
| 13 | 21559858  | rs2480171  | T | C | 0.2057  | 0.0693 | 0.076    | 0.0415 |
| 13 | 22298923  | rs606950   | A | G | 0.1585  | 0.0434 | 0.0723   | 0.0318 |
| 13 | 25257917  | rs55641580 | T | C | 0.1286  | 0.0702 | 0.1268   | 0.0419 |
| 13 | 27115424  | rs1331012  | T | G | 0.1514  | 0.051  | 0.0814   | 0.0304 |
| 13 | 32191408  | rs9532243  | A | C | 0.3595  | 0.0413 | 0.1685   | 0.0303 |
| 13 | 41397482  | rs9549297  | A | G | -0.1049 | 0.0607 | -0.1611  | 0.0362 |
| 13 | 41967193  | rs4274337  | A | G | -0.33   | 0.0612 | -0.1776  | 0.0366 |
| 13 | 42738672  | rs73187288 | A | C | -0.2105 | 0.0712 | -0.0484  | 0.0521 |
| 13 | 47189928  | rs912434   | T | G | 0.1772  | 0.0497 | 0.0144   | 0.0364 |
| 13 | 51489186  | rs9526707  | A | G | -0.1739 | 0.0456 | -0.0613  | 0.0334 |
| 13 | 56398286  | rs75961402 | A | G | 0.2759  | 0.0635 | 0.1297   | 0.038  |
| 13 | 58316637  | rs9563529  | T | G | 0.0554  | 0.0529 | 0.1014   | 0.0386 |
| 13 | 72364382  | rs3861113  | A | C | 0.1821  | 0.0812 | 0.1542   | 0.0487 |
| 13 | 73826901  | rs78474310 | A | G | -0.5088 | 0.1041 | -0.2878  | 0.0762 |
| 13 | 79238925  | rs4304924  | A | G | -0.0696 | 0.0415 | 0.0298   | 0.0305 |
| 13 | 79808655  | rs7988232  | A | G | 0.1392  | 0.0428 | 0.0725   | 0.0313 |
| 13 | 80707408  | rs1215469  | A | C | -0.1972 | 0.0563 | -0.1393  | 0.0336 |
| 13 | 97988689  | rs55684003 | A | G | 0.0602  | 0.0455 | 0.111    | 0.0334 |
| 13 | 111375132 | rs3742182  | T | C | -0.1044 | 0.0524 | 0.0429   | 0.0384 |
| 13 | 113636156 | rs9549328  | T | C | 0.2173  | 0.0553 | 0.0711   | 0.033  |
| 13 | 115000650 | rs7331680  | T | G | 0.3414  | 0.0583 | 0.167    | 0.0427 |
| 14 | 23313633  | rs17880989 | A | G | 0.2086  | 0.1346 | 0.2644   | 0.0979 |
| 14 | 23865885  | rs452036   | A | G | -0.1439 | 0.048  | 0.0863   | 0.0287 |
| 14 | 30122409  | rs17115145 | T | C | 0.1159  | 0.0433 | 0.0401   | 0.0317 |
| 14 | 35110857  | rs4424827  | T | C | -0.1497 | 0.0416 | -0.0849  | 0.0305 |
| 14 | 35871217  | rs8904     | A | G | 0.3201  | 0.0477 | 0.1202   | 0.0285 |
| 14 | 39858442  | rs34983854 | A | G | -0.2259 | 0.0463 | -0.0962  | 0.0276 |
| 14 | 50735947  | rs72683923 | T | C | 1.0239  | 0.1767 | 0.4041   | 0.1311 |
| 14 | 53377540  | rs9888615  | T | C | -0.2356 | 0.0499 | -0.081   | 0.0298 |
| 14 | 54107791  | rs210381   | A | G | -0.2151 | 0.0434 | -0.0093  | 0.0318 |
| 14 | 55285588  | rs7144602  | T | G | -0.1145 | 0.0455 | -0.0219  | 0.0332 |
| 14 | 69260028  | rs57786342 | A | G | 0.1597  | 0.0563 | 0.1082   | 0.0337 |
| 14 | 72462381  | rs11623535 | A | G | 0.1885  | 0.0471 | 0.1363   | 0.0345 |
| 14 | 73279420  | rs4903064  | T | C | -0.039  | 0.0485 | 0.1164   | 0.0356 |
| 14 | 75074316  | rs11159091 | A | G | 0.1433  | 0.0422 | 0.019    | 0.0309 |
| 14 | 89565130  | rs4904503  | T | C | 0.141   | 0.0498 | -0.0391  | 0.0297 |
| 14 | 93112102  | rs11160085 | T | C | 0.1327  | 0.052  | 0.0144   | 0.031  |
| 14 | 94465789  | rs8013933  | T | C | 0.0513  | 0.0467 | -0.0563  | 0.0342 |
| 14 | 98587630  | rs9323988  | T | C | -0.2377 | 0.0464 | -0.1105  | 0.0277 |
| 14 | 100225144 | rs1475130  | T | C | -0.1638 | 0.0485 | 1.00E-04 | 0.029  |
| 14 | 100742658 | rs28470843 | T | C | 0.0482  | 0.043  | -0.0414  | 0.0315 |
| 14 | 103859962 | rs8014182  | T | C | -0.3509 | 0.062  | -0.1593  | 0.0452 |
| 14 | 104620193 | rs34161718 | T | C | -0.0417 | 0.0614 | -0.1378  | 0.0367 |
| 15 | 26105602  | rs10873612 | T | C | -0.0995 | 0.0476 | -0.1062  | 0.0285 |
| 15 | 40317075  | rs11629850 | A | G | 0.1417  | 0.0416 | 0.1053   | 0.0305 |
| 15 | 41311799  | rs2925345  | T | C | 0.1559  | 0.0419 | 0.0706   | 0.0307 |
| 15 | 41974660  | rs4924570  | T | C | 0.0218  | 0.0461 | -0.1047  | 0.0337 |
| 15 | 48914926  | rs1036477  | A | G | 0.3401  | 0.0739 | -0.0656  | 0.0442 |
| 15 | 50810621  | rs3098186  | T | C | -0.1515 | 0.0428 | -0.0246  | 0.0313 |
| 15 | 59429160  | rs3191402  | A | G | -0.1832 | 0.0463 | -0.0176  | 0.0339 |
| 15 | 62808539  | rs956006   | T | C | -0.0698 | 0.0493 | 0.0425   | 0.0295 |
| 15 | 65166309  | rs832890   | T | C | 0.0691  | 0.0418 | -0.0471  | 0.0307 |
| 15 | 66869072  | rs7178615  | A | G | -0.1414 | 0.0473 | -0.1328  | 0.0283 |
| 15 | 68454523  | rs62004794 | A | G | -0.0166 | 0.0419 | -0.0905  | 0.0307 |
| 15 | 71621524  | rs11853359 | A | G | 0.048   | 0.0443 | -0.1445  | 0.0325 |
| 15 | 74557817  | rs61653296 | A | G | -0.1387 | 0.0572 | -0.1667  | 0.0341 |
| 15 | 75077367  | rs1378942  | A | C | -0.4867 | 0.0481 | -0.3725  | 0.0288 |
| 15 | 79156983  | rs62011052 | T | C | -0.0165 | 0.0644 | 0.1532   | 0.0385 |
| 15 | 81016227  | rs2759308  | A | G | 0.2592  | 0.046  | 0.1176   | 0.0275 |
| 15 | 83799632  | rs2034618  | T | C | -0.0151 | 0.0549 | -0.1093  | 0.0329 |
| 15 | 85162551  | rs7180952  | T | C | -0.0125 | 0.042  | -0.0911  | 0.0308 |
| 15 | 85680532  | rs3743157  | A | C | 0.1997  | 0.0549 | 0.0673   | 0.0403 |
| 15 | 90641809  | rs28611491 | T | C | 0.1289  | 0.0732 | -0.0679  | 0.0535 |
| 15 | 95312071  | rs12906962 | T | C | -0.2663 | 0.0493 | -0.1883  | 0.0295 |
| 15 | 96635898  | rs4984496  | T | G | 0.0718  | 0.0451 | 0.1024   | 0.0331 |
| 16 | 706067    | rs9932866  | A | G | 0.104   | 0.0425 | 0.0935   | 0.0311 |
| 16 | 1344291   | rs11248862 | A | G | 0.101   | 0.0657 | -0.0584  | 0.048  |

|    |          |             |   |   |         |        |         |        |
|----|----------|-------------|---|---|---------|--------|---------|--------|
| 16 | 4297651  | rs4785955   | T | G | 0.1369  | 0.0574 | -0.0248 | 0.0341 |
| 16 | 4943019  | rs12921187  | T | G | -0.2421 | 0.0458 | -0.1561 | 0.0274 |
| 16 | 6889675  | rs35450617  | T | G | -0.1298 | 0.0458 | -0.0548 | 0.0335 |
| 16 | 11198835 | rs11642631  | T | C | -0.0504 | 0.0421 | 0.0507  | 0.0308 |
| 16 | 14487036 | rs57327054  | T | C | -0.0831 | 0.0509 | -0.0951 | 0.0305 |
| 16 | 15912544 | rs3915425   | T | C | 0.1358  | 0.045  | 0.0174  | 0.033  |
| 16 | 20365654 | rs13333226  | A | G | 0.336   | 0.058  | 0.253   | 0.0347 |
| 16 | 30111904 | rs6565174   | A | C | -0.2231 | 0.068  | -0.1404 | 0.05   |
| 16 | 30936743 | rs72799341  | A | G | 0.0949  | 0.054  | 0.1572  | 0.0323 |
| 16 | 49768046 | rs10468291  | A | C | -0.1175 | 0.0463 | -0.1233 | 0.0277 |
| 16 | 50550137 | rs34941092  | A | G | -0.302  | 0.0651 | -0.1933 | 0.0388 |
| 16 | 51758116 | rs9932220   | A | G | -0.2235 | 0.0549 | -0.1714 | 0.0328 |
| 16 | 58566304 | rs37060     | A | G | 0.1201  | 0.047  | -0.0192 | 0.0344 |
| 16 | 65282820 | rs28633979  | A | C | -0.0832 | 0.042  | 0.0349  | 0.0308 |
| 16 | 66914492 | rs45474499  | T | C | 0.2763  | 0.101  | 0.3021  | 0.0741 |
| 16 | 69640217 | rs33063     | A | G | 0.1777  | 0.0647 | -0.0689 | 0.0386 |
| 16 | 75444572 | rs35261357  | T | C | 0.2778  | 0.0467 | 0.1025  | 0.0279 |
| 16 | 80864776 | rs56844452  | T | C | -0.3427 | 0.0911 | -0.0138 | 0.0545 |
| 16 | 81574197 | rs8059962   | T | C | -0.1688 | 0.0467 | -0.1138 | 0.0279 |
| 16 | 83045790 | rs7500448   | A | G | 0.225   | 0.0533 | -0.0262 | 0.0319 |
| 16 | 85318302 | rs7187540   | A | C | -0.1431 | 0.0458 | -0.0579 | 0.0335 |
| 16 | 87993889 | rs6540125   | T | G | 0.1864  | 0.0475 | 0.0714  | 0.0284 |
| 17 | 1333598  | rs12941318  | T | C | -0.208  | 0.0484 | -0.0798 | 0.0288 |
| 17 | 1958609  | rs4480845   | T | C | 0.1473  | 0.0447 | -0.0067 | 0.0327 |
| 17 | 3880148  | rs7215084   | T | C | 0.1662  | 0.0416 | 0.1443  | 0.0305 |
| 17 | 6473882  | rs28427409  | T | C | 0.1641  | 0.0463 | -0.0026 | 0.0277 |
| 17 | 7571752  | rs78378222  | T | G | 0.1831  | 0.2082 | -0.6128 | 0.1238 |
| 17 | 8078765  | rs8069739   | T | C | -0.1594 | 0.0441 | -0.137  | 0.0324 |
| 17 | 18185510 | rs4925159   | A | G | 0.2482  | 0.0419 | 0.2029  | 0.0307 |
| 17 | 27195674 | rs138285687 | T | C | -0.396  | 0.1098 | 0.0023  | 0.0807 |
| 17 | 29161503 | rs11080134  | A | G | -0.0927 | 0.0432 | -0.1031 | 0.0317 |
| 17 | 30032420 | rs1551355   | T | C | 0.1618  | 0.049  | 0.1193  | 0.0359 |
| 17 | 33313729 | rs3135967   | A | G | 0.0987  | 0.0422 | -0.0415 | 0.0309 |
| 17 | 40317241 | rs79089478  | T | C | 0.1399  | 0.1461 | -0.0656 | 0.087  |
| 17 | 40919596 | rs56228409  | A | C | -0.0848 | 0.0571 | 0.0685  | 0.0418 |
| 17 | 42680402 | rs9904409   | A | G | 0.2069  | 0.0707 | 0.0196  | 0.0519 |
| 17 | 45013271 | rs17608766  | T | C | -0.6153 | 0.0669 | -0.1889 | 0.0399 |
| 17 | 45888374 | rs62076103  | A | G | -0.26   | 0.0916 | 0.071   | 0.0672 |
| 17 | 46688256 | rs7406910   | T | C | -0.4877 | 0.0812 | -0.1593 | 0.0485 |
| 17 | 47402807 | rs12940887  | T | C | 0.2657  | 0.0469 | 0.2476  | 0.028  |
| 17 | 57853214 | rs2645466   | A | C | -0.1964 | 0.0494 | -0.0304 | 0.0295 |
| 17 | 58950791 | rs1036902   | T | C | -0.1786 | 0.0566 | -0.0597 | 0.0415 |
| 17 | 59485393 | rs2240736   | T | C | 0.4265  | 0.0525 | 0.2483  | 0.0314 |
| 17 | 60767151 | rs740698    | T | C | -0.1458 | 0.0477 | 0.0163  | 0.0285 |
| 17 | 61559625 | rs4308      | A | G | 0.2728  | 0.0477 | 0.1832  | 0.0285 |
| 17 | 62381714 | rs6504213   | T | C | -0.1381 | 0.0437 | 0.0108  | 0.032  |
| 17 | 64252393 | rs112260610 | T | C | 0.3389  | 0.0669 | 0.1428  | 0.0398 |
| 17 | 73949045 | rs2467099   | T | C | -0.191  | 0.0547 | -0.0837 | 0.0329 |
| 17 | 74686809 | rs35504735  | A | G | 0.0612  | 0.0415 | -0.0629 | 0.0304 |
| 17 | 76799898 | rs9302885   | A | G | 0.1367  | 0.0421 | 0.028   | 0.0309 |
| 17 | 79367409 | rs112280096 | A | C | -0.1169 | 0.0431 | -0.0781 | 0.0317 |
| 18 | 12711052 | rs963920    | T | G | -0.1135 | 0.0458 | 0.0228  | 0.0336 |
| 18 | 20158965 | rs4800420   | A | G | -0.0381 | 0.0451 | 0.0884  | 0.033  |
| 18 | 24546824 | rs1154214   | T | G | -0.2163 | 0.046  | -0.0862 | 0.0275 |
| 18 | 31161426 | rs10164193  | T | G | -0.3638 | 0.0854 | -0.2828 | 0.0511 |
| 18 | 34289285 | rs61735998  | T | G | 0.2049  | 0.136  | -0.166  | 0.0997 |
| 18 | 42141977 | rs12958173  | A | C | 0.3518  | 0.0495 | 0.1774  | 0.0296 |
| 18 | 43097750 | rs7236548   | A | C | 0.2643  | 0.0582 | 0.0047  | 0.0348 |
| 18 | 48142854 | rs745821    | T | G | 0.1772  | 0.0526 | 0.1411  | 0.0315 |
| 18 | 48283949 | rs36010659  | T | C | 0.195   | 0.0657 | -0.0047 | 0.0392 |
| 18 | 48799991 | rs11876341  | A | G | -0.2406 | 0.0461 | -0.1213 | 0.0338 |
| 18 | 51851616 | rs34163044  | A | C | 0.1036  | 0.0441 | 0.1494  | 0.0323 |
| 18 | 52607301 | rs72930904  | T | C | -0.2255 | 0.0622 | -0.1535 | 0.0372 |
| 18 | 54578482 | rs10048404  | T | C | -0.1412 | 0.0513 | -0.0586 | 0.0374 |
| 18 | 55732115 | rs7235890   | T | G | -0.2597 | 0.0757 | -0.1875 | 0.0453 |
| 18 | 57829135 | rs6567160   | T | C | 0.1618  | 0.0541 | 0.0847  | 0.0324 |
| 18 | 60223017 | rs12172847  | A | G | -0.1532 | 0.0453 | -0.0582 | 0.0332 |

|    |          |             |   |   |         |        |         |        |
|----|----------|-------------|---|---|---------|--------|---------|--------|
| 18 | 60845884 | rs12454712  | T | C | 0.2258  | 0.0426 | 0.0902  | 0.0312 |
| 18 | 73034151 | rs10460108  | A | G | 0.2039  | 0.0452 | 0.115   | 0.027  |
| 18 | 74070562 | rs1047922   | T | C | -0.1594 | 0.0711 | 0.0246  | 0.0425 |
| 19 | 670234   | rs7250835   | T | C | 0.1644  | 0.0596 | -0.0512 | 0.0436 |
| 19 | 1435771  | rs3760994   | A | G | -0.127  | 0.0531 | -0.0422 | 0.0314 |
| 19 | 2232221  | rs740406    | A | G | -0.5488 | 0.1017 | -0.1985 | 0.0603 |
| 19 | 5066330  | rs2613765   | A | G | -0.2304 | 0.0415 | -0.0594 | 0.0304 |
| 19 | 7224431  | rs7248104   | A | G | -0.1589 | 0.0463 | -0.0402 | 0.0277 |
| 19 | 7252756  | rs4247374   | T | C | -0.5063 | 0.0753 | -0.3389 | 0.045  |
| 19 | 8398714  | rs2009733   | A | G | 0.1064  | 0.0475 | 0.0983  | 0.0283 |
| 19 | 10332988 | rs10409243  | T | C | -0.1088 | 0.0443 | -0.0914 | 0.0324 |
| 19 | 10841472 | rs1529744   | T | C | -0.0138 | 0.0453 | 0.0926  | 0.0332 |
| 19 | 11526765 | rs167479    | T | G | -0.4284 | 0.0562 | -0.3415 | 0.034  |
| 19 | 11584818 | rs17638167  | T | C | -0.5228 | 0.1095 | -0.2379 | 0.0656 |
| 19 | 16436262 | rs3745318   | T | C | 0.2041  | 0.0565 | 0.1439  | 0.0335 |
| 19 | 17222584 | rs1077795   | A | G | 0.1486  | 0.0518 | 0.0961  | 0.0378 |
| 19 | 18558876 | rs8111708   | A | G | 0.0359  | 0.0479 | -0.0657 | 0.0286 |
| 19 | 19789528 | rs2304130   | A | G | -0.3072 | 0.086  | -0.2336 | 0.0512 |
| 19 | 21950402 | rs6511291   | T | C | -0.0953 | 0.0472 | -0.0757 | 0.0281 |
| 19 | 30294991 | rs62104477  | T | G | 0.087   | 0.0487 | 0.1301  | 0.0291 |
| 19 | 31927547 | rs8105753   | A | C | 0.1895  | 0.0487 | 0.0917  | 0.0291 |
| 19 | 32590773 | rs1821295   | T | C | -0.1021 | 0.0457 | -0.1243 | 0.0335 |
| 19 | 33889593 | rs7256564   | A | G | 0.2039  | 0.0487 | 0.1093  | 0.0291 |
| 19 | 39438532 | rs12983238  | A | G | -0.1717 | 0.0575 | -0.1589 | 0.0342 |
| 19 | 41858921 | rs1800470   | A | G | -0.0721 | 0.0426 | 0.0363  | 0.0312 |
| 19 | 45412079 | rs7412      | T | C | -0.3363 | 0.0753 | 0.0591  | 0.055  |
| 19 | 46180414 | rs34783010  | T | G | 0.1463  | 0.0506 | 0.0137  | 0.0371 |
| 19 | 49605705 | rs73046792  | A | G | -0.2413 | 0.069  | -0.1067 | 0.0412 |
| 19 | 50935809 | rs138877676 | T | G | -0.6453 | 0.1882 | -0.4843 | 0.1374 |
| 20 | 2793063  | rs2143635   | T | C | -0.1816 | 0.0793 | 0.0341  | 0.0474 |
| 20 | 6657554  | rs11087740  | T | C | -0.0985 | 0.0417 | 0.0527  | 0.0306 |
| 20 | 8626271  | rs6108168   | A | C | -0.2037 | 0.0519 | -0.1415 | 0.031  |
| 20 | 10458688 | rs680515    | A | G | -0.1031 | 0.0447 | 0.113   | 0.0327 |
| 20 | 10969030 | rs1327235   | A | G | -0.3548 | 0.045  | -0.239  | 0.0269 |
| 20 | 11886643 | rs1232482   | T | C | -0.1187 | 0.0424 | -0.0969 | 0.0311 |
| 20 | 17882452 | rs2618647   | A | G | -0.1773 | 0.0455 | -0.1199 | 0.0272 |
| 20 | 19465907 | rs6081613   | A | G | 0.1358  | 0.0506 | -0.088  | 0.0302 |
| 20 | 30169673 | rs6060114   | T | C | 0.2809  | 0.062  | 0.1617  | 0.037  |
| 20 | 32298286 | rs13042148  | T | C | -0.2515 | 0.0657 | -0.1878 | 0.0393 |
| 20 | 36849007 | rs4811601   | T | C | -0.0511 | 0.0422 | -0.1423 | 0.0309 |
| 20 | 42797358 | rs6031435   | A | G | -0.2268 | 0.0456 | -0.1111 | 0.0273 |
| 20 | 47308798 | rs6095241   | A | G | -0.1884 | 0.0454 | -0.1238 | 0.0271 |
| 20 | 48004238 | rs237485    | A | G | 0.1551  | 0.0505 | 0.1157  | 0.0301 |
| 20 | 50108980 | rs6021247   | A | G | 0.1506  | 0.0411 | 0.0912  | 0.0302 |
| 20 | 57751117 | rs6015450   | A | G | -0.655  | 0.0691 | -0.4801 | 0.0413 |
| 20 | 62694319 | rs35213536  | T | G | 0.3396  | 0.0531 | 0.1313  | 0.0388 |
| 21 | 16556367 | rs1882961   | T | C | 0.2147  | 0.0466 | 0.1033  | 0.0341 |
| 21 | 35596842 | rs9976596   | T | C | 0.0785  | 0.0599 | -0.0832 | 0.0438 |
| 21 | 37692507 | rs62229372  | T | C | 0.2217  | 0.072  | 0.1568  | 0.0523 |
| 21 | 44760603 | rs12627651  | A | G | 0.4162  | 0.0528 | 0.2479  | 0.0316 |
| 21 | 45107562 | rs9306160   | T | C | -0.2069 | 0.0474 | -0.1687 | 0.0284 |
| 21 | 47422412 | rs35796750  | T | C | -0.1108 | 0.0467 | 0.0091  | 0.0278 |
| 21 | 47962811 | rs11701512  | A | G | 0.0645  | 0.0552 | -0.0517 | 0.0403 |
| 22 | 19967980 | rs12628032  | T | C | 0.1972  | 0.0499 | 0.018   | 0.0298 |
| 22 | 28056338 | rs134041    | T | C | -0.0576 | 0.0432 | 0.079   | 0.0317 |
| 22 | 28921347 | rs9608690   | A | G | -0.308  | 0.0912 | -0.1563 | 0.0544 |
| 22 | 29451671 | rs4823006   | A | G | 0.1407  | 0.0455 | 0.1098  | 0.0272 |
| 22 | 30768777 | rs5753103   | A | G | 0.1031  | 0.0459 | -0.0245 | 0.0274 |
| 22 | 32517431 | rs9609429   | T | C | 0.1626  | 0.0513 | 0.1423  | 0.0307 |
| 22 | 38117943 | rs5750482   | T | C | 0.1127  | 0.0429 | 0.0076  | 0.0314 |
| 22 | 40729614 | rs470113    | A | G | -0.0784 | 0.058  | 0.0599  | 0.0346 |
| 22 | 42038786 | rs73161324  | T | C | 0.2121  | 0.1156 | -0.1117 | 0.0689 |
| 22 | 50219952 | rs77692990  | T | C | -0.1628 | 0.076  | -0.0047 | 0.0557 |
| 22 | 50727921 | rs28578714  | T | C | 0.1761  | 0.0421 | 0.1008  | 0.0309 |

**Supplemental table 2. Description of each of 5 cognitive tests administered to UK Biobank participants.**

| Cognitive test                 | Description                                                                                                                                                                                                                                                                                                                                                                                                                                   |
|--------------------------------|-----------------------------------------------------------------------------------------------------------------------------------------------------------------------------------------------------------------------------------------------------------------------------------------------------------------------------------------------------------------------------------------------------------------------------------------------|
| <b>Pairs Memory test</b>       | Participants are asked to memorize the position of as many matching pairs of cards as possible. The cards are then turned face down on the screen and the participant is asked to touch as many pairs as possible in the fewest tries. Multiple rounds were conducted. The first round used 3 pairs of cards and the second 6 pairs of cards. The result of the test is the total number of incorrect matches.                                |
| <b>Reaction Time test</b>      | Based on 12 rounds of the card-game 'Snap'. In each round, the participant is shown two cards at a time; if both cards are the same, they press a button-box that is on the table in front of them as quickly as possible. The result of the test is the mean time it took to first click the 'snap' button across all 12 rounds.                                                                                                             |
| <b>Numeric Memory test</b>     | This test designed to assess numeric short-term memory, as part of the touchscreen questionnaire. The participant was shown a 2-digit number to remember. The number then disappeared and after a short while they were asked to enter the number onto the screen. The number became one digit longer each time they remembered correctly (up to a maximum of 12 digits). The result of the test is the number of items remembered correctly. |
| <b>Prospective Memory test</b> | Early in the touchscreen cognitive section, the participant is shown the message "At the end of the games we will show you four colored shapes and ask you to touch the Blue Square. However, to test your memory, we want you to actually touch the Orange Circle instead." The result of this test is whether the task was completed correctly.                                                                                             |
| <b>Fluid Intelligence test</b> | This test evaluates the capacity to solve problems that require logic and reasoning ability, independent of acquired knowledge. The participant has 2 minutes to complete as many questions as possible from the test. The result of this test is the number of questions answered correctly.                                                                                                                                                 |

**Supplemental Table 3. Population characteristics for participants of all race/ethnic groups who completed all five cognitive tests at baseline.**

| Variable, n (%)                | All Study participants<br>n=48,118 | Low polygenic risk for hypertension*<br>n=9,625 | Intermediate polygenic risk for hypertension*<br>n=28,8870 | High polygenic risk for hypertension*<br>n=9,623 | P value<br>Comparison across genetic risk categories |
|--------------------------------|------------------------------------|-------------------------------------------------|------------------------------------------------------------|--------------------------------------------------|------------------------------------------------------|
| <b>Demographics</b>            |                                    |                                                 |                                                            |                                                  |                                                      |
| <b>Age</b>                     | 56.4 (8.3)                         | 56.4 (8.3)                                      | 56.4 (8.3)                                                 | 56.5 (8.3)                                       | 0.51                                                 |
| <b>Male sex</b>                | 2,1921 (45.6)                      | 4,429 (46.1)                                    | 13,157 (45.7)                                              | 4,294 (44.7)                                     | 0.13                                                 |
| <b>European</b>                | 42,080 (87.5)                      | 9,118 (94.9)                                    | 27,542 (95.4)                                              | 9,323 (96.8)                                     | <0.001                                               |
| <b>Black</b>                   | 332 (0.7)                          | 60 (0.6)                                        | 213 (0.8)                                                  | 59 (0.7)                                         |                                                      |
| <b>Asian</b>                   | 976 (2.0)                          | 275 (2.9)                                       | 584 (2.0)                                                  | 114 (1.2)                                        |                                                      |
| <b>Other race/ethnicity</b>    | 4,730 (9.8)                        | 172 (1.6)                                       | 531 (1.8)                                                  | 127 (1.3)                                        |                                                      |
| <b>Vascular risk factors</b>   |                                    |                                                 |                                                            |                                                  |                                                      |
| <b>Hypertension</b>            | 14,133 (29.4)                      | 2,158 (22.5)                                    | 8,392 (29.1)                                               | 3,565 (37.1)                                     | <0.001                                               |
| <b>Hyperlipidemia</b>          | 6,638 (13.8)                       | 1,188 (12.4)                                    | 4,007 (13.9)                                               | 1,434 (14.9)                                     | <0.001                                               |
| <b>Diabetes</b>                | 2,354 (4.9)                        | 446 (4.6)                                       | 1,398 (4.9)                                                | 507 (5.3)                                        | 0.11                                                 |
| <b>Current smoker</b>          | 4,758 (9.9)                        | 942 (9.8)                                       | 2,880 (10.0)                                               | 927 (9.7)                                        | 0.65                                                 |
| <b>Prior smoker</b>            | 16,941 (35.3)                      | 3,339 (34.9)                                    | 10,153 (35.3)                                              | 3,415 (35.7)                                     |                                                      |
| <b>BMI, mean (SD)</b>          | 27.36 (4.75)                       | 27.47 (4.79)                                    | 27.34 (4.77)                                               | 27.28 (4.64)                                     | 0.014                                                |
| <b>Comorbidities</b>           |                                    |                                                 |                                                            |                                                  |                                                      |
| <b>Myocardial infarction</b>   | 1417 (2.9)                         | 227 (2.4)                                       | 863 (3.0)                                                  | 323 (3.4)                                        | <0.001                                               |
| <b>Atrial fibrillation</b>     | 1999 (4.2)                         | 377 (3.9)                                       | 1185 (4.1)                                                 | 433 (4.5)                                        | 0.110                                                |
| <b>Admission BP, mean (SD)</b> |                                    |                                                 |                                                            |                                                  |                                                      |
| <b>Systolic BP</b>             | 138.8 (18.8)                       | 134.4 (17.9)                                    | 138.8 (18.6)                                               | 143.2 (19.4)                                     | <0.001                                               |
| <b>Diastolic BP</b>            | 82.44 (10.03)                      | 80.68 (9.84)                                    | 82.46 (9.96)                                               | 84.17 (10.15)                                    | <0.001                                               |

Abbreviations: BMI = body mass index; SD = standard deviation; BP = blood pressure.

\* Polygenic risk for hypertension estimated using genetic risk variants for systolic blood pressure.

Supplemental Table 4. Association between polygenic susceptibility to hypertension and baseline cognitive status in participants of all race/ethnic groups.

| Linear regression model                                                                                                         | Comparison of polygenic susceptibility to hypertension | Polygenic susceptibility to hypertension<br>Genetic risk variants for systolic BP |                |                  | Polygenic susceptibility to hypertension<br>Genetic risk variants for diastolic BP |                |                  |
|---------------------------------------------------------------------------------------------------------------------------------|--------------------------------------------------------|-----------------------------------------------------------------------------------|----------------|------------------|------------------------------------------------------------------------------------|----------------|------------------|
|                                                                                                                                 |                                                        | % change                                                                          | Beta (SE)      | Test for trend p | % change                                                                           | Beta (SE)      | Test for trend p |
| <b>Model 1</b><br>Adjusted for age, sex and PC 1 through 4                                                                      | Low versus intermediate genetic risk                   | -2.7%                                                                             | -0.027 (0.011) | <0.001           | -1.9%                                                                              | -0.019 (0.011) | 0.03             |
|                                                                                                                                 | Low versus high genetic risk                           | -5.0%                                                                             | -0.050 (0.014) |                  | -3.0%                                                                              | -0.030 (0.014) |                  |
| <b>Model 2</b><br>Unadjusted                                                                                                    | Low versus intermediate genetic risk                   | -2.1%                                                                             | -0.021 (0.012) | 0.02             | -2.1%                                                                              | -0.021 (0.012) | 0.19             |
|                                                                                                                                 | Low versus high genetic risk                           | -3.4%                                                                             | -0.034 (0.014) |                  | -1.9%                                                                              | -0.019 (0.014) |                  |
| <b>Model 3</b><br>Adjusted for age, sex, diabetes, hyperlipidemia, smoking and PC 1 through 4                                   | Low versus intermediate genetic risk                   | -2.3%                                                                             | -0.023 (0.011) | <0.001           | -1.6%                                                                              | -0.016 (0.011) | 0.06             |
|                                                                                                                                 | Low versus high genetic risk                           | -4.4%                                                                             | -0.044 (0.014) |                  | -2.5%                                                                              | -0.025 (0.014) |                  |
| <b>Model 4</b><br>Adjusted for age, sex, diabetes, hyperlipidemia, smoking, history of myocardial infarction and PC 1 through 4 | Low versus intermediate genetic risk                   | -2.3%                                                                             | -0.023 (0.011) | 0.002            | -1.5%                                                                              | -0.015 (0.011) | 0.07             |
|                                                                                                                                 | Low versus high genetic risk                           | -4.3%                                                                             | -0.043 (0.014) |                  | -2.4%                                                                              | -0.024 (0.014) |                  |

**Supplemental Table 5. Association between polygenic susceptibility to hypertension and results of 5 different cognitive tests in participants of all race/ethnic groups.**

| Cognitive test                 | Analytical approach | Test interpretation                         | Comparison of polygenic susceptibility to hypertension | Polygenic susceptibility to hypertension<br>Genetic risk variants for systolic BP |                     | Polygenic susceptibility to hypertension<br>Genetic risk variants for diastolic BP |                     |
|--------------------------------|---------------------|---------------------------------------------|--------------------------------------------------------|-----------------------------------------------------------------------------------|---------------------|------------------------------------------------------------------------------------|---------------------|
|                                |                     |                                             |                                                        | Beta (SE)                                                                         | Test for trend<br>p | Beta (SE)                                                                          | Test for trend<br>p |
| <b>Pairs Memory test</b>       | Linear regression   | Lower values imply better cognitive status  | Low versus intermediate genetic risk                   | 0.008 (0.011)                                                                     | 0.42                | -0.003 (0.011)                                                                     | 0.92                |
|                                |                     |                                             | Low versus high genetic risk                           | 0.011 (0.013)                                                                     |                     | 0.001 (0.013)                                                                      |                     |
| <b>Reaction Time test</b>      | Linear regression   | Lower values imply better cognitive status  | Low versus intermediate genetic risk                   | 0.015 (0.011)                                                                     | 0.11                | 0.012 (0.011)                                                                      | 0.03                |
|                                |                     |                                             | Low versus high genetic risk                           | 0.023 (0.014)                                                                     |                     | 0.030 (0.014)                                                                      |                     |
| <b>Numeric Memory test</b>     | Linear regression   | Higher values imply better cognitive status | Low versus intermediate genetic risk                   | -0.019 (0.011)                                                                    | 0.02                | -0.011 (0.011)                                                                     | 0.40                |
|                                |                     |                                             | Low versus high genetic risk                           | -0.030 (0.013)                                                                    |                     | -0.011 (0.013)                                                                     |                     |
| <b>Prospective Memory test</b> | Logistic regression | Higher values imply better cognitive status | Low versus intermediate genetic risk                   | -0.014 (0.029)                                                                    | 0.35                | 0.012 (0.029)                                                                      | 0.72                |
|                                |                     |                                             | Low versus high genetic risk                           | -0.033 (0.036)                                                                    |                     | -0.013 (0.036)                                                                     |                     |
| <b>Fluid Intelligence test</b> | Linear regression   | Higher values imply better cognitive status | Low versus intermediate genetic risk                   | -0.023 (0.011)                                                                    | 0.0002              | -0.023 (0.011)                                                                     | 0.06                |
|                                |                     |                                             | Low versus high genetic risk                           | -0.052 (0.014)                                                                    |                     | -0.026 (0.014)                                                                     |                     |
